# Supplementary material for: Bacterial indole-3-lactic acid affects epithelium–macrophage crosstalk to regulate intestinal homeostasis
Source: PubMed Central journal article supplement — Proc Natl Acad Sci U S A. 2023 Oct 30;120(45):e2309032120. doi: 10.1073/pnas.2309032120 (PMC10636326; doi:10.1073/pnas.2309032120), 2023-10-30
Supplement: pnas.2309032120.sapp.pdf [file pnas.2309032120.sapp.pdf]

1 **Supplemental Information**

2 Bacterial indole-3-lactic acid affects epithelium-macrophage crosstalk to  
3 regulate intestinal homeostasis

4

5

6 Kaiyuan Yu, Qianqian Li, Xuan Sun, Xianping Peng, Qiang Tang, Hongyu Chu, Lu  
7 Zhou, Bangmao Wang, Zhemin Zhou, Xueqin Deng, Jianming Yang, Junqiang Lv,  
8 Ran Liu, Chunhui Miao, Wei Zhao, Zhi Yao\*, Quan Wang\*

9

10 **\*Corresponding Author:**

11 Quan Wang

12 Email: wangquan@tmu.edu.cn

13 Zhi Yao

14 Email: yaozhi@tmu.edu.cn

15

16 **This file includes:**

17 Supplementary methods

18 Figure S1 to S10

19 Table S1 to S2

20

21

22

23

24

25

## 1 **Supplementary methods**

2 **Fecal microbiota transplantation (FMT) in DSS-challenged mice.** After collection,  
3 the fecal samples from people taking tinidazole or normal people were immediately  
4 stored at 4 °C under anaerobic conditions. Two grams of feces were homogenized in 5  
5 mL of sterile Brain Heart Infusion containing 30% glycerine and 0.1% L-cysteine with  
6 vortex mixing and then centrifuged at 800 g for 5 min. The supernatants passed a 70-  
7 µm filter for the removal of large particles under anaerobic conditions. To remove  
8 intestinal microorganisms before FMT, mice were given a combination of the following  
9 antibiotics (AVMN) in drinking water: ampicillin (A610028-0025, 1 g/L), neomycin  
10 (A610366-0025, 1 g/L), metronidazole (A600633-0025, 1 g/L) and vancomycin  
11 (A600983-0001, 500 mg/L) (SangonBiotech, Shanghai, China). Mice were gavaged  
12 daily with 200 µl fresh fecal solution for fourteen days after six days of AVMN and two  
13 days of water treatment. After seven days of stool gavage, mice were given 3.5% DSS  
14 simultaneously to induce colitis for another 7 days.

15 The mouse model to test ILA in tinidazole-treated feces was shown in Fig. S7A. Two  
16 grams of stool was collected from healthy people and resuspended in 5 mL sterile  
17 anaerobic PBS and then centrifuged at 800×g for 5 min. The supernatant then passed  
18 through a 70-µm filter to remove large particulate. WT recipient mice were pretreated  
19 with AVMN for 7 days and then were intra-gastrically administered with 200 µL fresh  
20 fecal solution once for 10 days. Thereafter, mice were provided with the tinidazole (1  
21 g/L, CM00694, Proteintech, Chicago, IL, USA) for 5 days. 200 mg of feces were  
22 collected from per mice on the last day of tinidazole treatment. Antibiotic-containing  
23 water was renewed every 3 to 4 days to maintain efficacy.

24 **DNA extraction and 16S rRNA gene sequencing.** Microbial genomic DNA in human  
25 and mouse feces samples was extracted using the Stool DNA Kit (D4015-02, Omega

1 Bio-tek, Norcross, GA, USA) according to the manufacturer's protocols. The final  
2 DNA concentration and purification were determined by a NanoDrop 2000 UV-vis  
3 spectrophotometer (Thermo Scientific, Wilmington, USA). The DNA was evaluated by  
4 1% (wt/vol) agarose gel electrophoresis.

5 16S rRNA gene sequencing was performed by Majorbio Bio-Pharm Technology Co.,  
6 Ltd. (Shanghai, China). Primers 338F (5'-ACTCCTACGGGAGGCAGCAG-3') and  
7 806R (5'-GGACTACHVGGGTWTCTAAT-3') were used to amplify the V3-V4  
8 hypervariable regions of the 16S rRNA gene by a thermocycler PCR system (GeneAmp  
9 9700, ABI, USA). The amplification program of the PCR was carried out as follows:  
10 95 °C for 3 min, followed by 27 cycles of 95 °C for 30 s, 55 °C for 30 s and 72 °C for  
11 45 s, and a last extension at 72 °C for 10 min. The 20 µL PCR reaction system contained  
12 4 µL 5×FastPfu buffer, 2 µL dNTPs (2.5 mM), 0.8 µL 338F primer (5 µM), 0.8 µL  
13 806R primer (5 µM), 0.4 µL FastPfu polymerase, 0.2 µL BSA , and 10 ng template  
14 DNA. All samples were amplified in triplicate. The PCR product was isolated from a  
15 2% agarose gel and purified with the AxyPrep DNA Gel Extraction Kit (Axygen  
16 Biosciences, Union City, CA, USA) according to the manufacturer's instructions and  
17 quantified with the Quantus Fluorometer (Promega, USA). The purified amplicons  
18 were pooled in equimolar amounts. Paired-end sequencing was performed on an  
19 Illumina MiSeq PE300 platform/NovaSeq PE250 platform (Illumina, San Diego, USA)  
20 in accordance with standard protocol by Majorbio Bio-Pharm Technology Co. Ltd.  
21 (Shanghai, China). Bioinformatic analysis of the fecal microbiota was performed with  
22 the Majorbio Cloud platform (<https://cloud.majorbio.com>). Raw data for bacterial  
23 sequence were deposited in the NCBI Sequence Read Archive (SRA) database under  
24 accession number PRJNA946039 and PRJNA945177, respectively.

25 **Bacterial identification.** The Bacterial Genomic DNA Extraction Kit (DP302-02,

1 TIANGEN, Beijing, China) was used to extract bacterial genomic DNA. Isolated  
2 strains were sequenced using 16S rRNA gene-specific primer pairs: 27F (5'-  
3 AGAGTTTGATCCTGGCTCAG-3') and 1492R (5'-GGTTACCTTGTTACGACTT-  
4 3') in Sangon Biotech (Shanghai, China) to identify the bacterial species. The resulting  
5 sequences were compared with sequences in the EzBioCloud 16S rRNA databases  
6 ([www.ezbiocloud.net](http://www.ezbiocloud.net)).

7 **Isolation of lymphocytes.** Mesenteric lymph nodes were ground with RPMI 1640  
8 medium containing 10% FBS on a 70- $\mu$ m cell strainer to generate a single-cell  
9 suspension. After centrifugation, the cells were resuspended in RPMI 1640 medium for  
10 cell staining. The colon was opened longitudinally and washed by PBS, subsequently  
11 washed by PBS supplemented with 2 mM dithiothreitol (DTT, D1070, Solarbio, Beijing,  
12 China) for 10 min once and three times by PBS containing 5 mM EDTA for 30 min.  
13 The colonic tissue was then cut with scissors into small pieces and placed in 1 mL of  
14 RPMI 1640 medium containing 10% fetal bovine serum, 1 mg/mL collagenase IV  
15 (C5138, Sigma-Aldrich), 0.05 mg/mL hyaluronic acid, and 100 ng/mL DNaseI at 150  
16 rpm for 30 minutes at 37 °C. After digesting, the cell solution was filtered through a  
17 70- $\mu$ m cell strainer (352350, BD Biosciences, San Jose, CA, USA) and re-suspended  
18 in 40% Percoll (Healthcare, Chicago, IL, USA), followed by centrifugation at 670 g for  
19 30 min at 4 °C. Lamina propria lymphocytes were obtained in precipitation.

20 **Flow cytometry.** Single cell suspensions were surface stained with the following  
21 antibodies: anti-CD45 conjugated to PE-Cy7 (25-0451-82, eBioscience, San Diego, CA,  
22 USA), anti-CD11c conjugated to APC (117309, Biolegend, San Diego, CA, USA), anti-  
23 MHCII conjugated to PE (107607, Biolegend), anti-CD103 conjugated to PerCP/Cy5.5  
24 (46-1031-82, eBioscience), anti-CD4 conjugated to APC-Cy7 (100414, Biolegend),  
25 anti-CD3 conjugated to FITC (100204, Biolegend), anti-CD4 conjugated to PE-Cy7

1 (25-0041-81, eBioscience), anti-CD25 conjugated to PE (102008, Biolegend), anti-  
2 CD45 conjugated to eFlour 506 (69-0451-82, Invitrogen), anti-CD11b conjugated to  
3 PE-Cy7 (25-0112-81, Invitrogen), anti-Ly6G conjugated to APC (127614, Biolegend),  
4 anti-F4/80 conjugated to FITC (11-4801-85, eBioscience), anti-Ly6C conjugated to  
5 PerCP/Cy5.5 (45-5932-80, Invitrogen), anti-MHCII conjugated to Alexa Fluor 700  
6 (107622, Biolegend), anti-CCR2 conjugated to Brilliant Violet 421 (150605,  
7 Biolegend), anti-CCR5 conjugated to Brilliant Violet 506 (743697, eBioscience), anti-  
8 Lin conjugated to FITC (22-7770-72, Invitrogen), anti-CX3CR1 conjugated to  
9 PE/Dazzle (149013, Biolegend). For Treg and ILC3 cell analysis, after cell surface  
10 staining, cell suspensions were fixed, permeabilized using Foxp3/transcription factor  
11 staining buffer sets (00-5523-00, eBioscience) according to the manufacturer's  
12 instructions, and stained with anti-ROR $\gamma$ t conjugated to APC (17-6981-82, eBioscience)  
13 and anti-Foxp3-APC (320014, Biolegend). For analysis of Th1, Th2, and Th17 cells,  
14 lymphocytes were stimulated for 5 h using a cell activation cocktail with Brefeldin A  
15 (423303, Biolegend). After being washed, cells were stained with dead cells using the  
16 Zombie NIRTM Fixable Viability Kit (423105, Biolegend), anti-CD3 conjugated to  
17 FITC (100204, Biolegend), and anti-CD4 conjugated to PE-Cy7 (25-0041-81,  
18 eBioscience). Then, cells were fixed for 30min with fixation buffer (420801,  
19 Biolegend), permeabilized for 10 min with intracellular staining permeabilization wash  
20 buffer (421002, Biolegend), and stained for 1h at 24 °C with anti-IL-17A conjugated to  
21 PE-Cy7 (25-7177-80, eBioscience) and anti-IFN- $\gamma$  conjugated to PerCP/Cy5.5 (505821,  
22 Biolegend). These data were acquired on a FACS Canto II Flow Cytometer (BD  
23 Biosciences) and analyzed using the FlowJo software (FlowJo, Ashland, OR, USA).

24 **RNA extraction and real-time PCR.** BMDMs were stimulated with live bacteria  
25 (MOI = 0.2, 1, 5h) and LPS (0.5  $\mu$ g/ml). In some experiments, SW480 cells were treated

1 with live bacteria (MOI = 1, 5, 10, 3h), heat-killed bacteria (MOI = 1, 5, 10, 3 h) or  
2 bacterial culture supernatant (bacterial culture supernatant: cell culture medium = 0.5:1,  
3 1:1, 1.5:1, 3 h), bacterial culture supernatant fractions (bacterial culture supernatant:  
4 cell culture medium = 1.5:1, 3 h), LPS (6 µg/ml, L2880, Sigma-Aldrich), ILA (HY-  
5 113099, Med Chem Express, NJ, USA, 100 µM or 200 µM, 6h), HPLA (HY-113219,  
6 Med Chem Express, 10 µM or 50 µM, 6h), 5-MTP (M4001, Sigma-Aldrich, 10 µM or  
7 50 µM, 6h), KynA (HY-100806, Med Chem Express, 10 µM or 50 µM, 6h), DCA  
8 (347795, Sigma-Aldrich, 10 mM, 16h), oligomycin (HY-16589, Med Chem Express, 5  
9 nM, 3 h), AHR inhibitor CH-223191 (10 µM; HY-12684, Med Chem Express, 16 h),  
10 NF-κB inhibitor BAY 11-7082 (1 µM, HY-10257, Med Chem Express, NJ, USA, 16 h),  
11 NF-κB agonist PMA (100 nM, HY-18739, Med Chem Express, 16 h) , HIF inhibitor  
12 PX-478 (1 µM, HY-10231, Med Chem Express, 16 h), HIF agonist ML228 (10 nM,  
13 HY-10231, Med Chem Express, 3 h).

14 RNA from colonic tissues and cells was extracted using the Trizol reagent (Solarbio)  
15 in accordance with the manufacturer's directions. Subsequently, cDNA synthesis was  
16 performed using a HiFiScript cDNA Synthesis Kit (CW2569M, Cwbio). qRT-PCR was  
17 performed using SYBR Green qPCR Master mixes (CW0957M, Cwbio) on a  
18 thermocycler PCR system (LightCycler 96, Roche), and β-actin was used as endogenous  
19 control gene.  $2^{-\Delta\Delta CT}$  method was used to calculate the transcript levels of the indicated  
20 genes.

21 **Intestinal permeability assay.** The mouse model was prepared as described in Fig. 2A.  
22 At day 6 after 3.5% DSS treatment, mice were gavaged orally with FITC-dextran (0.6  
23 mg/g body weight, MW 3000–5000, Sigma-Aldrich, St. Louis, MO, USA). Mice  
24 receiving dextran-FITC were euthanized after 5 hours and blood was collected by  
25 cardiac puncture. The blood was centrifuged at 4 °C 2000g for 10 min. Plasma was

1 analyzed by measuring fluorescence intensity with Synergy HT Multi-Mode Microplate  
2 Reader (Bio-tek Winooski, Vermont, USA) at an excitation wavelength of 485 nm and  
3 emission wavelength of 525 nm.

4 **Neutrophil depletion.** The mouse model used to study the role of neutrophils in the  
5 ILA treatment of DSS-induced colitis has been shown in Fig. S8K. From day -1, mice  
6 received IgG or anti-Ly-6G antibodies (0.2mg/per mouse, clone: 1A8, BioXCell) every  
7 3 days during the course of the experiment. Mice were given 2.5% DSS for 8 days.  
8 From day 2, mice were daily gavaged with sterile water or 40 mg/kg ILA and sacrificed  
9 on day 6. Neutrophil depletion efficiency was determined by flow cytometry staining  
10 in cLP.

11 **Macrophage transfer experiment.** Splenocytes were isolated from WT mice and  
12 CD45<sup>+</sup>CD11b<sup>+</sup>F4/80<sup>+</sup> cells (macrophages) were sorted to high purity (>95%). 10<sup>6</sup>  
13 splenic macrophages were purified by flow cytometry and adoptively transferred into  
14 male CCR2<sup>-/-</sup> mice on day -1 and 4 via tail vein injection. Mice were given 2.5% DSS  
15 for 8 days. From day 2, mice were daily gavaged with sterile water or 40 mg/kg ILA  
16 and sacrificed on day 8 (Fig. S9A).

17 **Analysis of bacteria-derived metabolites.** The bacterial solution was centrifuged at  
18 8000 g/min at 4 °C for 5 min to obtain supernatants, then filtered through a 0.22-mm  
19 membrane and separated using 100-, 50-, 30-, 10-, and 3-kDa molecular weight cutoff  
20 (MWCO) membranes (Merck Millipore, Billerica, MA, USA). The <3 kDa fraction of  
21 bacterial supernatants was frozen in a -80 °C refrigerator overnight, then freeze-dried  
22 into powder in a vacuum freeze dryer (Alpha 1–4 LD plus, CHRIST, Germany). 50 mg  
23 of powder was added to a 2 mL centrifuge tube, and a 6 mm diameter grinding bead  
24 was added. 400 µL of extraction solution (methanol:water = 4:1) containing 0.02  
25 mg/mL internal standard (L-2-chlorophenylalanine) was used to extract the metabolites.

1 Samples were ground using the Wonbio-96c (Shanghai Wanbo Biotechnology Co., Ltd.)  
2 frozen tissue grinder for 6 min (-10 °C, 50 Hz), followed by ultrasonic extraction at a  
3 low temperature for 30 min (5 °C, 40 kHz). The samples were stored at -20 °C for 30  
4 min, centrifuged for 15 min (4 °C, 13000 g), and the supernatant was pipetted into the  
5 sample vial for LC-MS/MS analysis. As a part of the system conditioning and quality  
6 control process, a pooled sample was prepared by combining equal volumes of each  
7 sample as a quality control (QC) control. The QC samples were disposed of and tested  
8 in the same manner as the analytic samples.

9 The LC-MS/MS analysis of the sample was performed on a Thermo UHPLC-Q  
10 Exactive HF-X system equipped with an ACQUITY HSS T3 column (100 mm × 2.1  
11 mm i.d., 1.8 μm; Waters, USA) at Majorbio Bio-Pharm Technology Co. Ltd. (Shanghai,  
12 China). The mass spectrometric data were acquired using a Thermo UHPLC-Q  
13 Exactive HF-X Mass Spectrometer equipped with an electrospray ionization (ESI)  
14 source operating in positive mode and negative scanning mode.

15 The pretreatment of LC/MS raw data was performed by Progenesis QI (Waters  
16 Corporation, Milford, USA) software, and a three-dimensional data matrix in CSV  
17 format was exported. Internal standard peaks, as well as any known false positive peaks  
18 (including noise, column bleed, and derivatized reagent peaks), were removed from the  
19 data matrix, dereplicated, and peak pooled. At the same time, the metabolites were  
20 identified by searching databases, and the main databases were the HMDB  
21 (<http://www.hmdb.ca/>), Metlin (<https://metlin.scripps.edu/>) and Majorbio Database.  
22 Uploaded to the Majorbio platform (<https://cloud.majorbio.com>) cloud, the data matrix  
23 obtained from the database search for data analysis. Differences in metabolites between  
24 the two groups were mapped into their biochemical pathways by means of metabolic  
25 enrichment and pathway analysis based on the KEGG database ([8](http://www.</a></p></div><div data-bbox=)



1 genome.jp/kegg/). Enrichment analysis was performed using the Python packages  
2 “scipy.stats” (<https://docs.scipy.org/doc/scipy/> ) to obtain the most relevant biological  
3 pathways for experimental treatments.

4 **RNA sequencing.** SW480 cells were treated with PBS or LPS (6 µg/ml) in addition  
5 with DMSO or ILA (200 µM) for 6 h. Total RNA was extracted from the tissue using  
6 Trizol reagent according to the manufacturer’s instructions (Invitrogen), and genomic  
7 DNA was removed using DNase I (TaKara). The quality of the RNA was determined  
8 using the 2100 Bioanalyser (Agilent Technologies) and quantified by the ND-2000  
9 (NanoDrop Technologies). Only high-quality RNA samples (OD260/280=1.8~2.2,  
10 OD260/230≥2.0, RIN≥8.0, 28S:18S≥1.0, >1 µg) were used for sequencing library  
11 construction. Shanghai Majorbio Bio-pharm Biotechnology Co., Ltd. (Shanghai, China)  
12 performed RNA purification, reverse transcription, library construction and sequencing  
13 according to the manufacturer’s instructions (Illumina, San Diego, CA). The  
14 transcriptome library was prepared following the TruSeq RNA sample preparation Kit  
15 from Illumina (San Diego, CA) using 1 µg of total RNA.

16 The expression level of each gene was calculated using the transcript TPM method  
17 to identify DEGs between two different groups. RSEM  
18 (<http://deweylab.biostat.wisc.edu/rsem/>) was used to quantify gene abundances. In  
19 addition, functional-enrichment analysis, including GO (Gene Ontology,  
20 <http://www.geneontology.org>) and KEGG (Kyoto Encyclopedia of Genes and Genomes,  
21 <http://www.genome.jp/kegg/>) was performed to identify which DEGs were  
22 significantly enriched in GO terms and metabolic pathways at P-adjust ≤ 0.05 compared  
23 to the whole-transcriptome background. Goatools  
24 (<https://github.com/tanghaibao/Goatools>) and KOBAS  
25 (<http://kobas.cbi.pku.edu.cn/home.do>) performed GO functional enrichment and

1 KEGG pathway analysis. Analysis of differential gene expression, the KEGG pathway,  
2 and GSEA were performed at the Majorbio I-Sanger Cloud platform  
3 (<https://cloud.majorbio.com>). RNA-sequencing data have been deposited in NCBI  
4 under accession number PRJNA946043 and PRJNA946045.

5 **Western blotting.** Cells were lysed in RIPA lysis buffer (R0020, Solarbio, Beijing,  
6 China) with the addition of protease inhibitors (Roche, Basel, Switzerland) and  
7 phosphatase inhibitors (Roche). Protein lysates were boiled with 5 × SDS-buffer in  
8 99 °C for 10 min. Samples were then separated on 10% SDS-PAGE gels and transferred  
9 to PVDF membrane. The PVDF membrane was blocked with 5% milk and incubated  
10 with anti-IκBα antibody (1:1000, ab32518, Abcam), anti-p-IκBα antibody (1:1000,  
11 Affinity Biosciences), anti-HIF1A antibody (1:1000, Affinity Biosciences) and anti-β-  
12 actin antibody (1:10000, ab6276, Abcam) overnight in 4 °C, followed by incubation for  
13 1 h with appropriate secondary antibodies. Immunoblots were visualized with  
14 Immobilon Western Chemiluminescent HRP Substrate (Merck Millipore, Billerica, MA,  
15 USA). The blot was scanned by Amersham Imager 600 with integrated analysis  
16 software (GE Healthcare Life Sciences, Buckinghamshire, United Kingdom).  
17 Immunoblots were quantified by using ImageJ software (National Institutes of Health,  
18 Bethesda, USA).

19  
20  
21  
22  
23  
24  
25



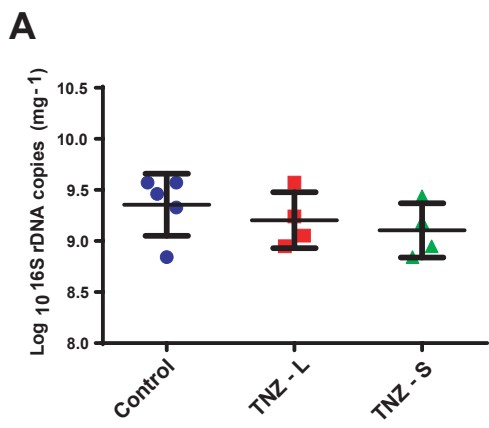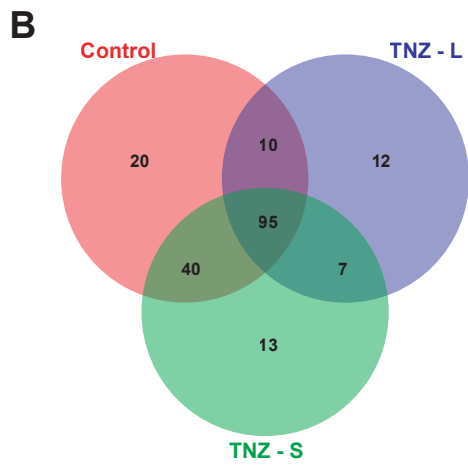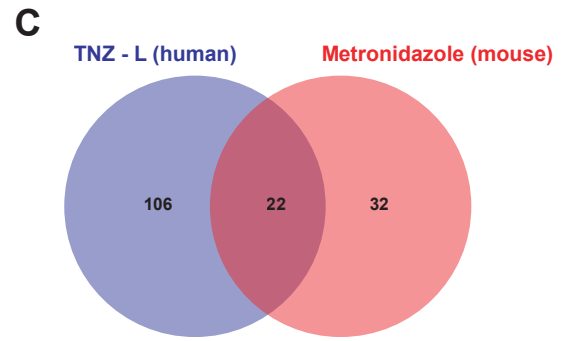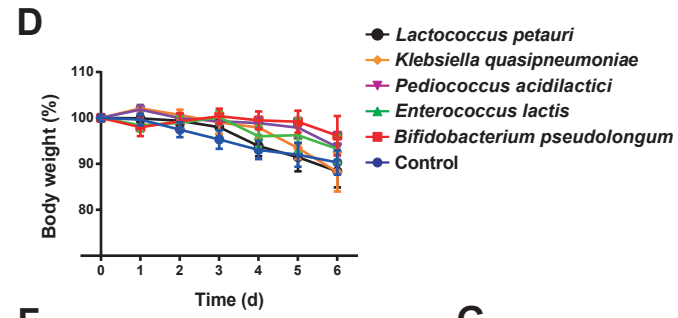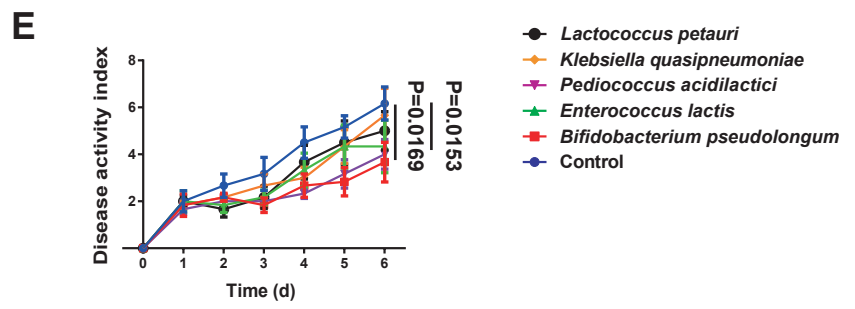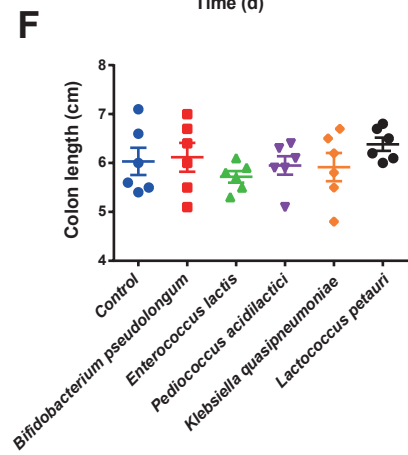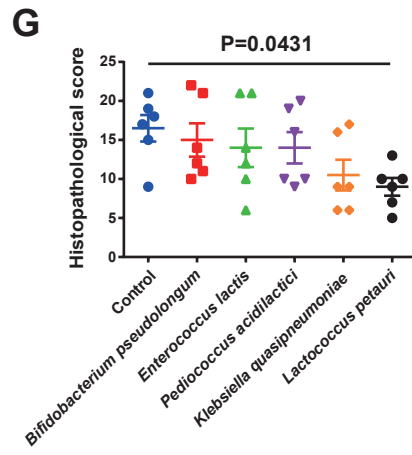

1 **Figure S1. Effects of bacteria enriched in the gut microbiota of TNZ-L group on**  
2 **DSS-induced colitis in mice.** (A-C) Stool samples from people taking tinidazole and  
3 normal people were collected and analyzed by 16S rRNA gene sequencing. (A) The  
4 amounts of bacterial DNA. (B) Comparison of different genus in the stool samples from  
5 the control, TNZ-L and TNZ-S groups through Venn diagrams. (C) Comparison of  
6 different genus in the stool samples from the TNZ-L group and mice treat with  
7 metronidazole and DSS in our previous data (SRA, PRJNA657382). (D-E) Schematic  
8 diagram is same to Figure 2A with different single bacteria administration. Analysis of  
9 body weight (D), disease activity index (E), colon length (F) and histopathological  
10 scores (G) in each group. n = 4 or 5 (A-C), n = 6 (D-G). Data are the mean  $\pm$  SEM. One-  
11 way ANOVA (A, F-G), two-way ANOVA (D-E).

12  
13  
14  
15  
16  
17  
18  
19  
20  
21  
22  
23  
24  
25

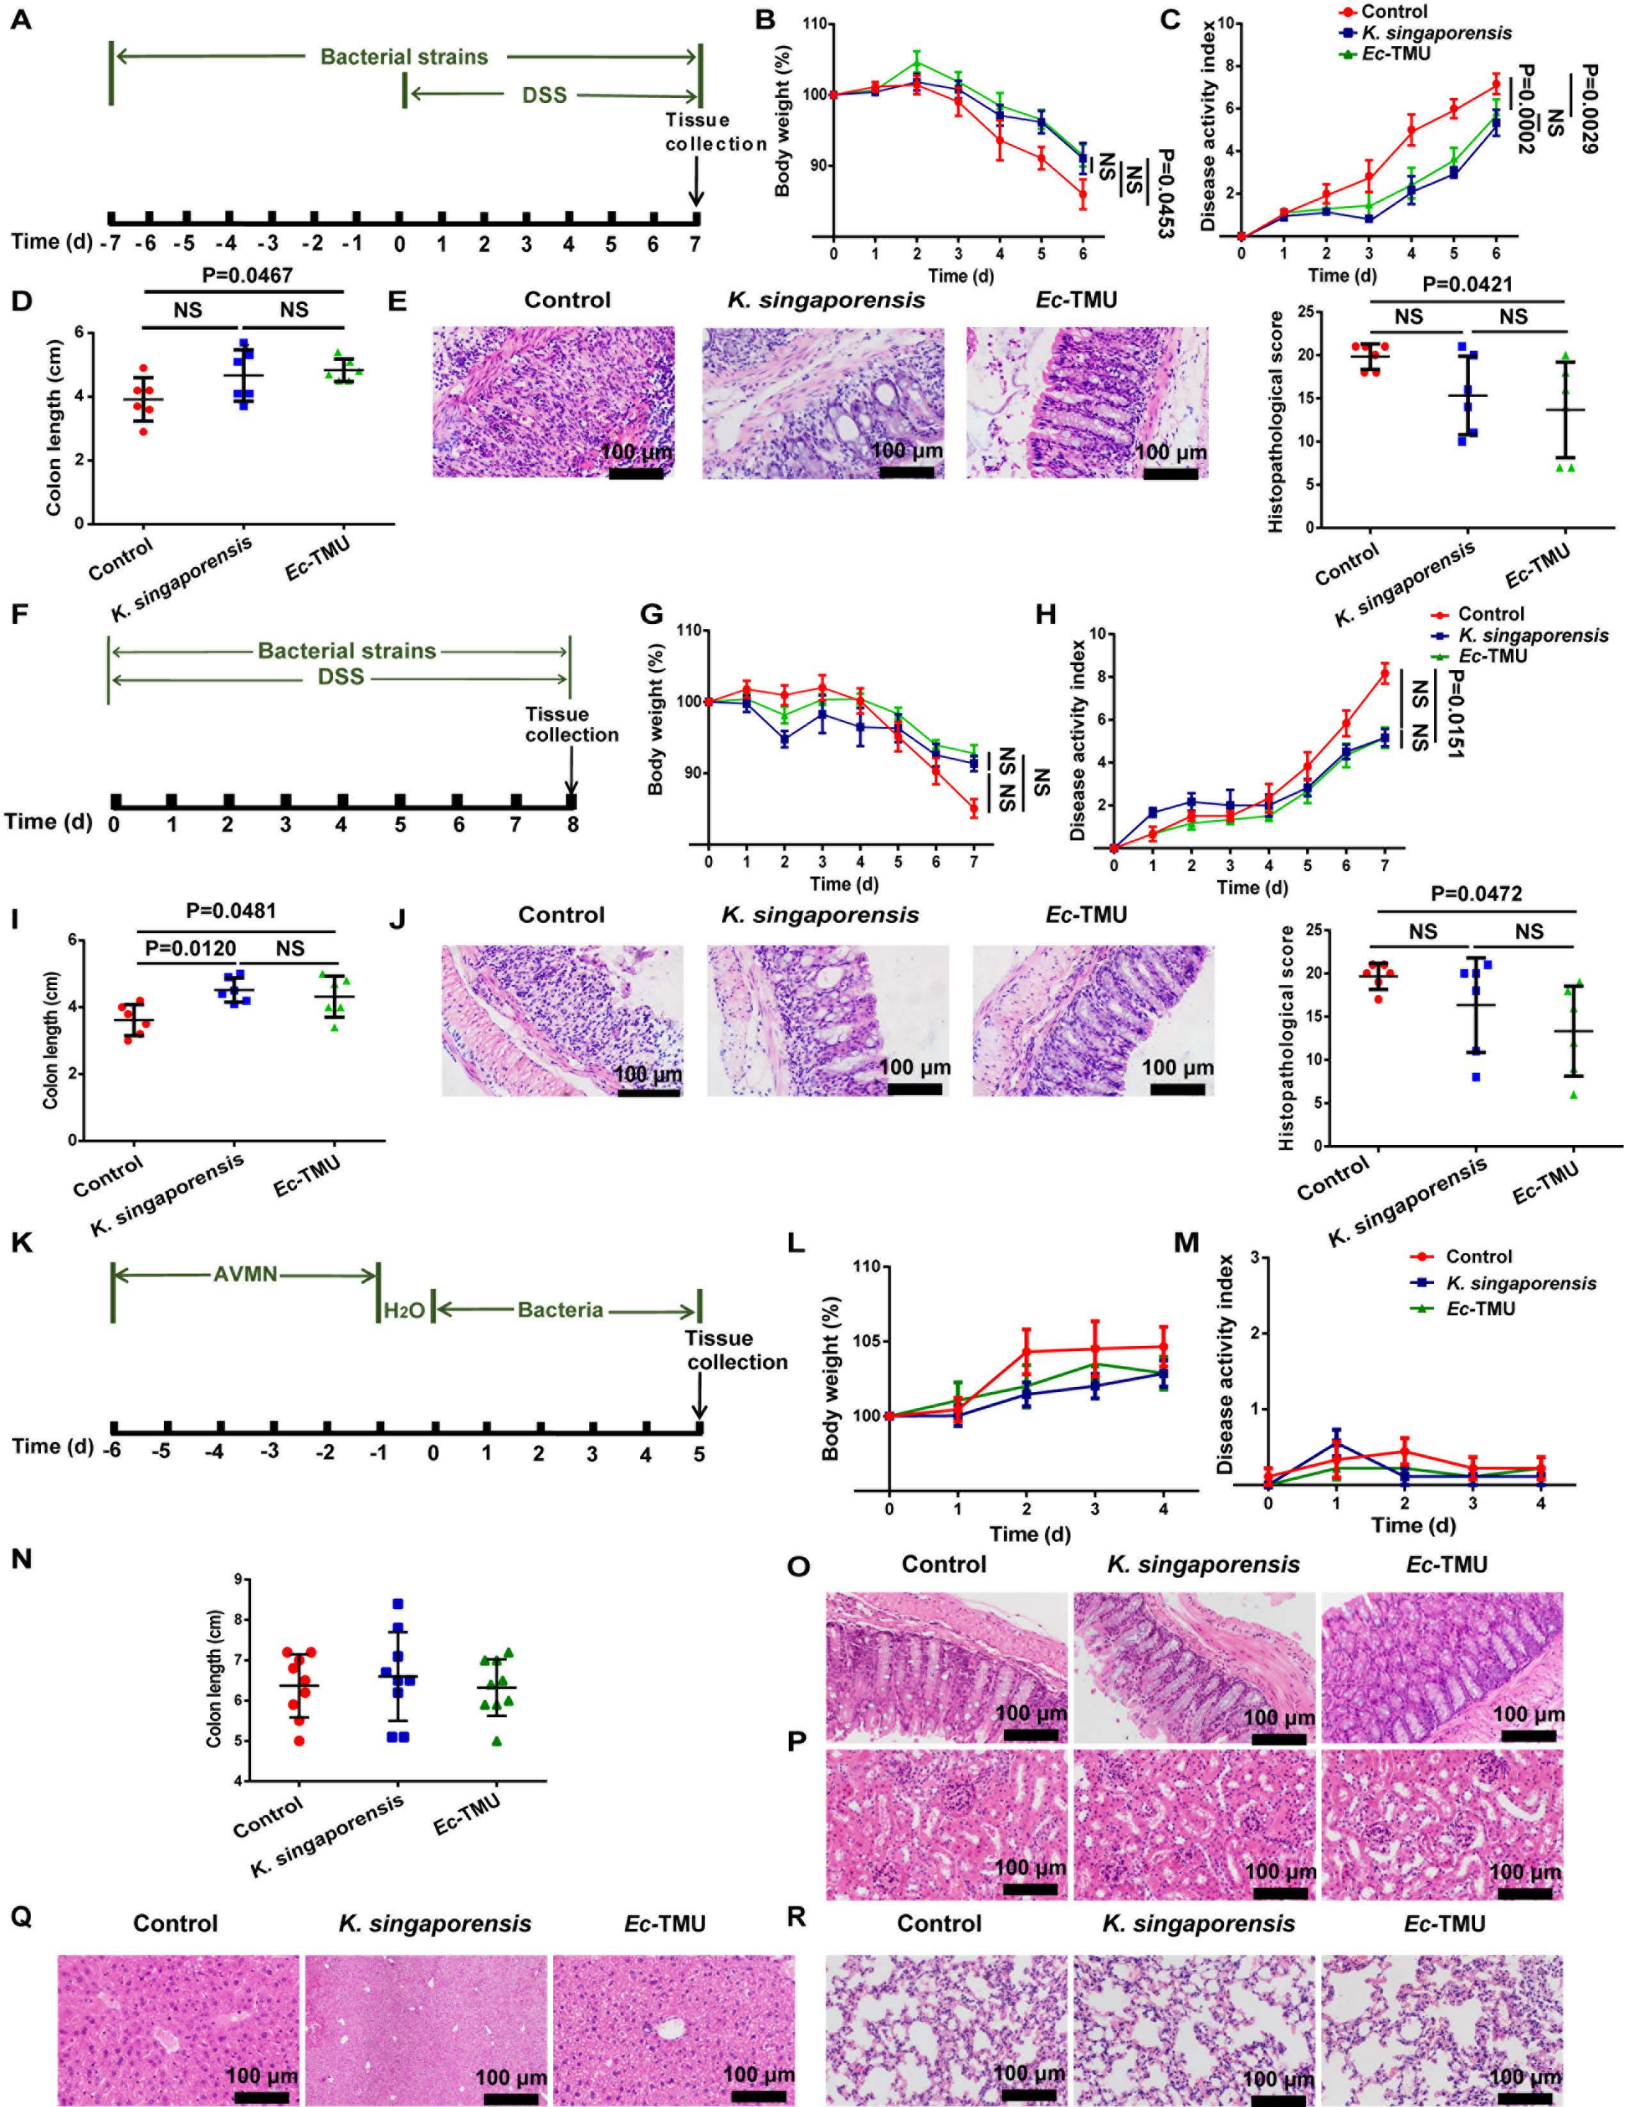

1 **Figure S2. *Ec*-TMU protects against DSS-induced acute colitis in different models.**

2 (A) Schematic diagram for the mouse model to detect the prophylactic effect of single  
3 bacteria on DSS-induced colitis with the presence of gut microbiota. Mice were daily  
4 gavaged with  $10^9$  CFU of each strain for 7 days, and were subsequently exposed to the  
5 same strain or water plus 3% DSS for another 7 days, and mice were euthanized. (B-E)  
6 Analysis of body weight (B), disease activity index (C), colon length (D) and  
7 histopathological scores (E) in each group. (F) Schematic diagram for the mouse model  
8 to detect the therapeutic effect of single bacteria on DSS-induced colitis with the  
9 presence of gut microbiota. Mice were daily gavaged with  $10^9$  CFU of each strain or  
10 water in addition with 3% DSS exposing for 8 days, and mice were euthanized. (G-J)  
11 Analysis of body weight (G), disease activity index (H), colon length (I) and  
12 histopathological scores (J) in each group. (K) Schematic diagram for the mouse model  
13 to detect bacterial safety. Mice were gavaged daily with  $10^9$ CFU of each strain or sterile  
14 water after five days of AVMN and one day of water treatment for 5 days, and mice  
15 were euthanized. (L-R) Analysis of body weight (L), disease activity index (M), colon  
16 length (N) and histopathological changes in colon (O), kidney (P), liver (Q), and lung  
17 (R). n = 6 (B-D, G-J); n = 9 (L-N). Data are the mean  $\pm$ SEM. Two-way ANOVA (B-C,  
18 G-H, L-M) or one-way ANOVA (D-E, I-J, N). NS, not significant.

19  
20  
21  
22  
23  
24  
25

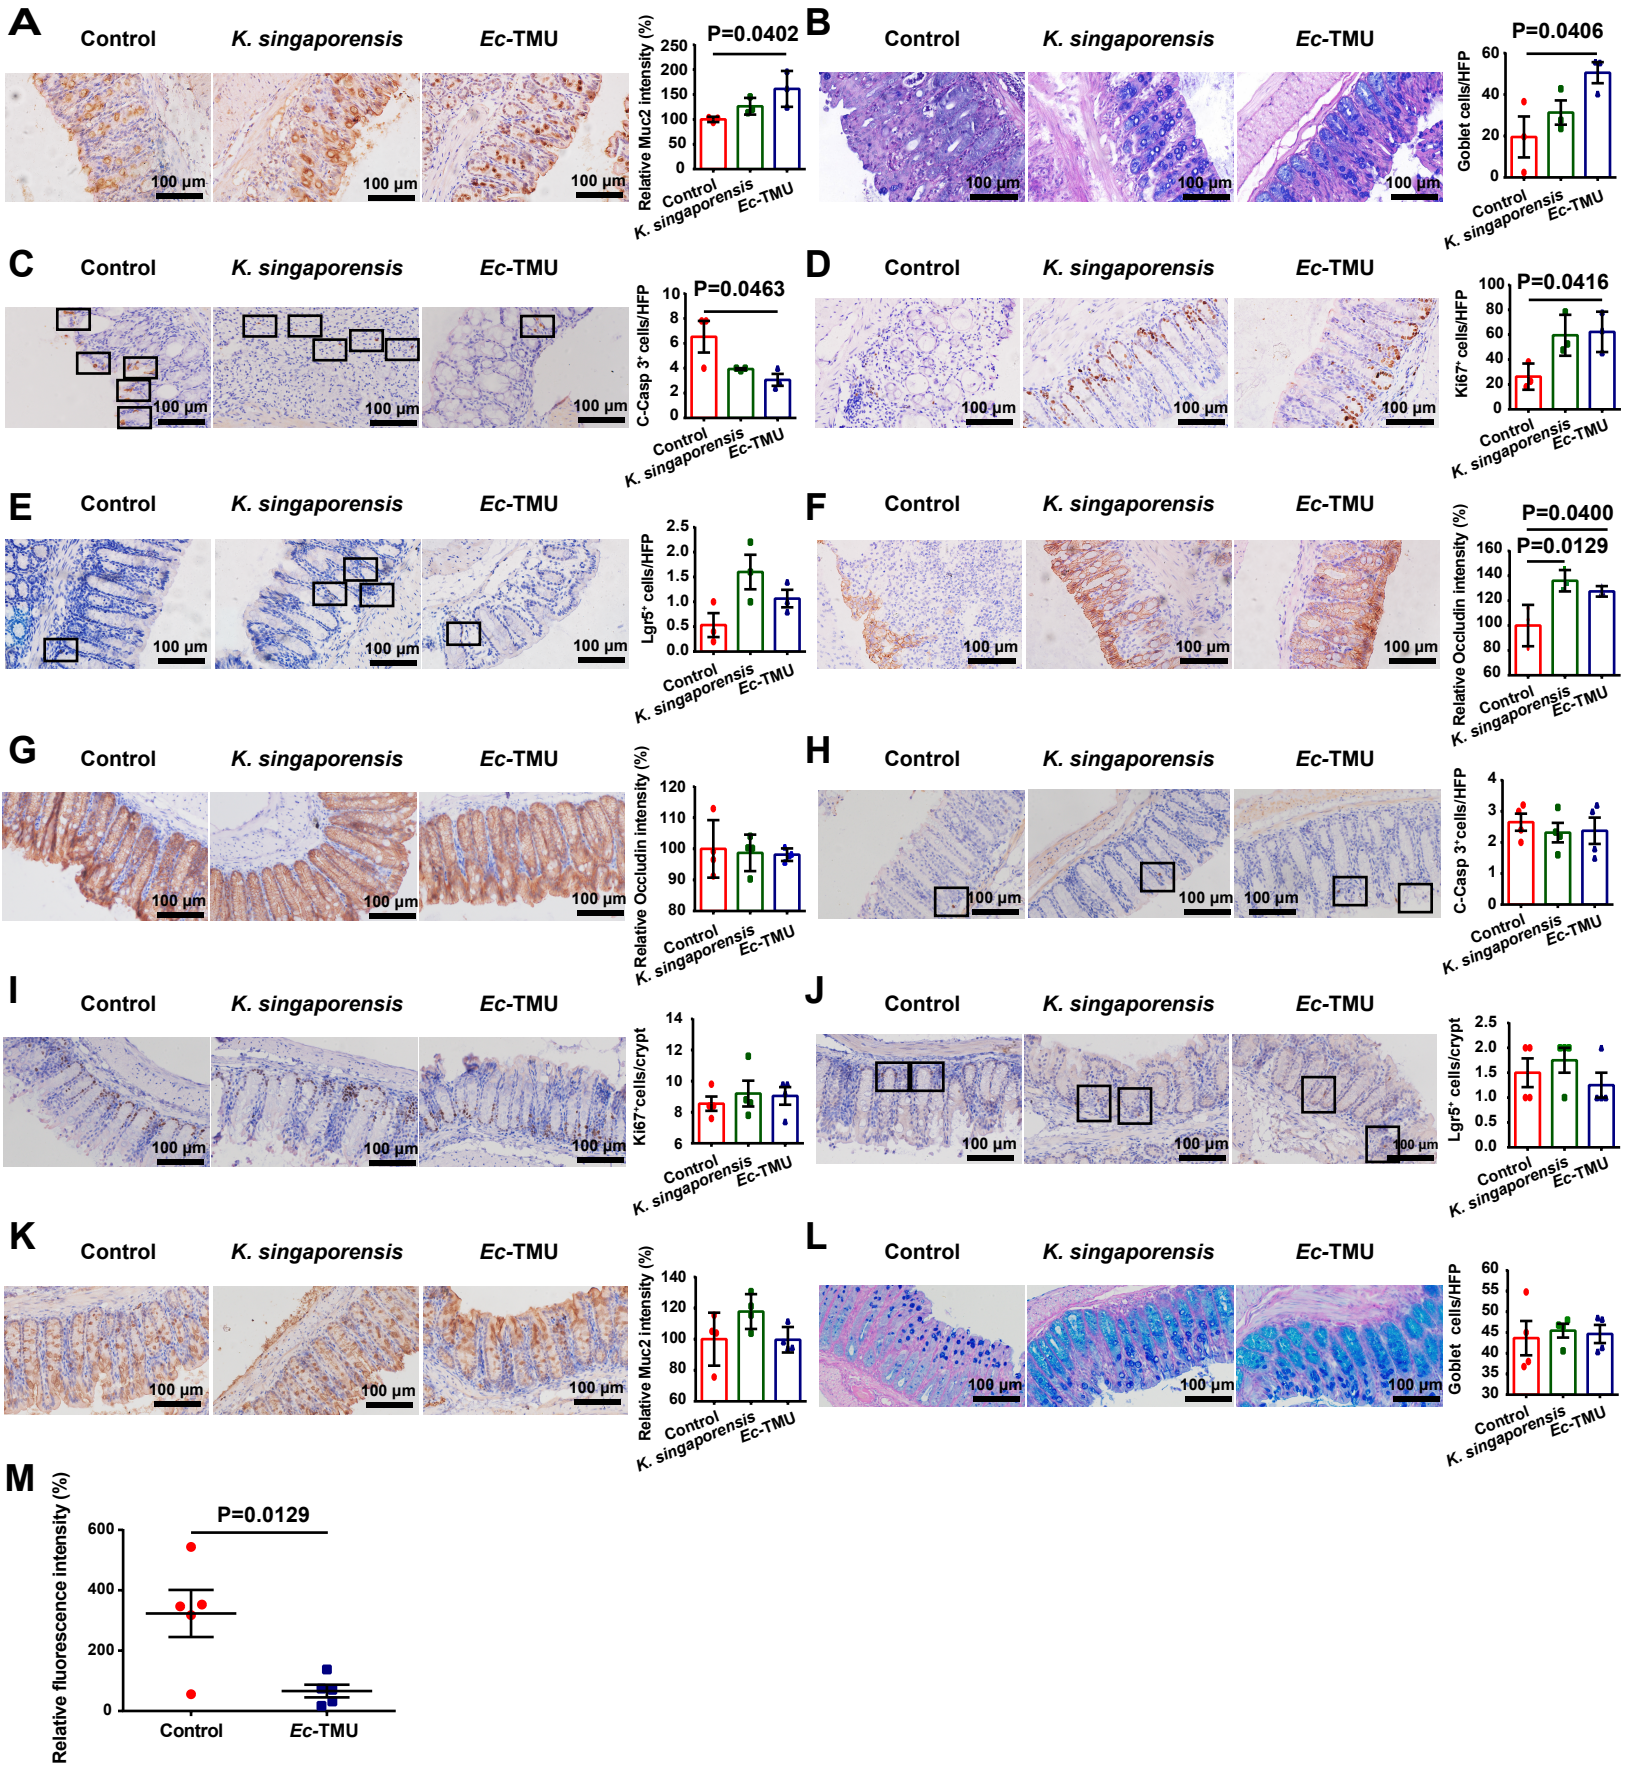



1 **Figure S3. Ec-TMU protects intestinal epithelial integrity in DSS-induced colitis.**

2 Schematic diagram is same to Figure 2A. (A-F) Representative Muc2 (A), goblet cells  
3 (B), cleaved caspase-3 (C), Ki67 (D), lgr5 (E) and Occludin (F) staining and  
4 quantitation in colon sections as indicated. Schematic diagram is same to Figure S3K.  
5 (G-L) Representative Occludin (G), cleaved caspase-3 (H), Ki67 (I), lgr5 (J), Muc2 (K)  
6 and goblet cells (L) staining and quantitation in colon sections as indicated. (M)  
7 Fluorescein isothiocyanate (FITC)-dextran measurement in serum of mice from models  
8 shown in Figure 2A. n = 3 (A to F). n = 4 (G to L). n = 5 (M). Data are the mean  $\pm$ SEM.  
9 One-way ANOVA (A to L) or unpaired Student's t test (M).

10  
11  
12  
13  
14  
15  
16  
17  
18  
19  
20  
21  
22  
23  
24  
25

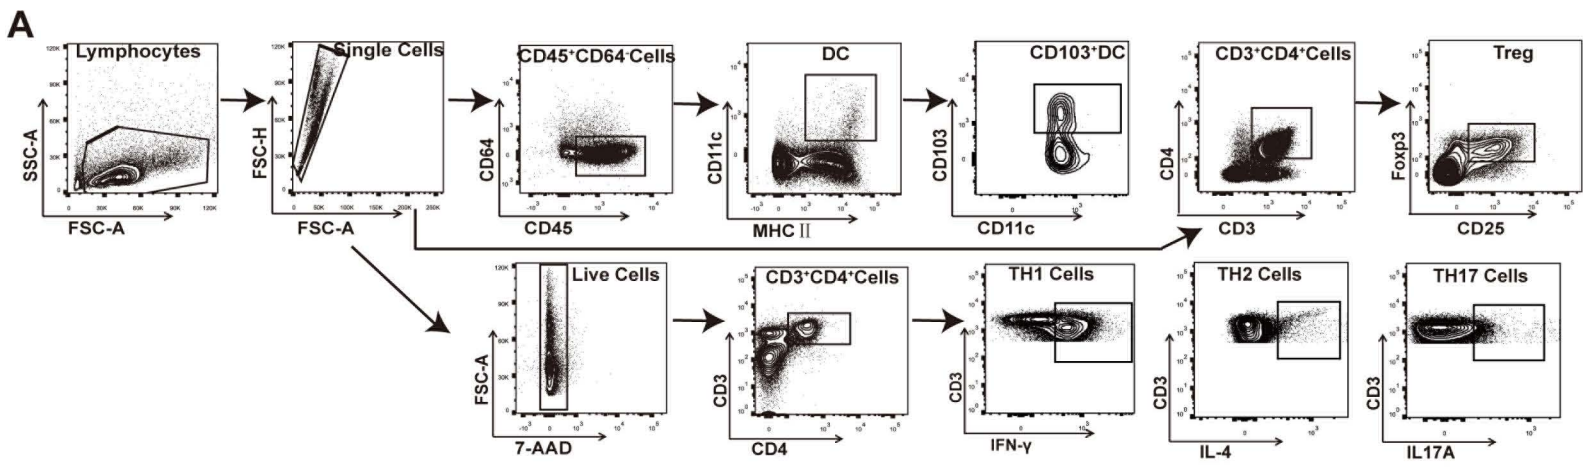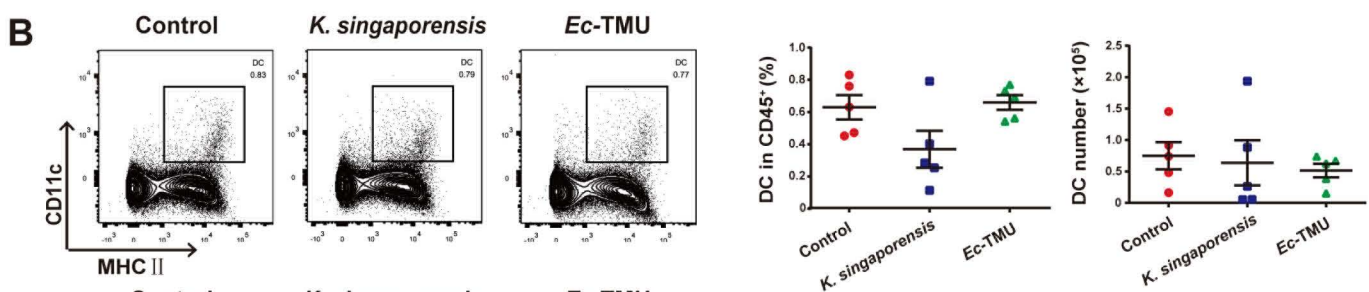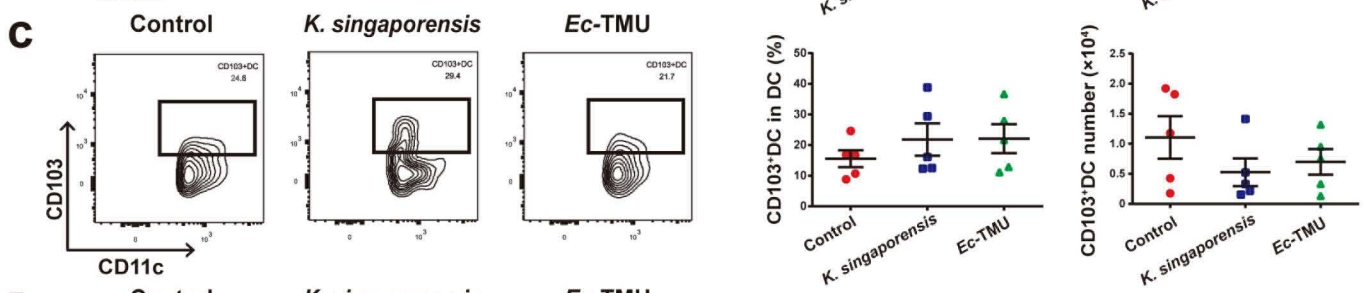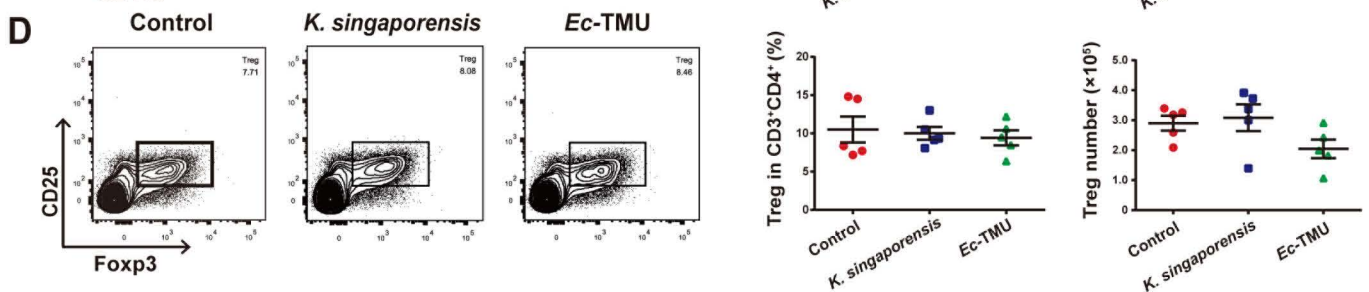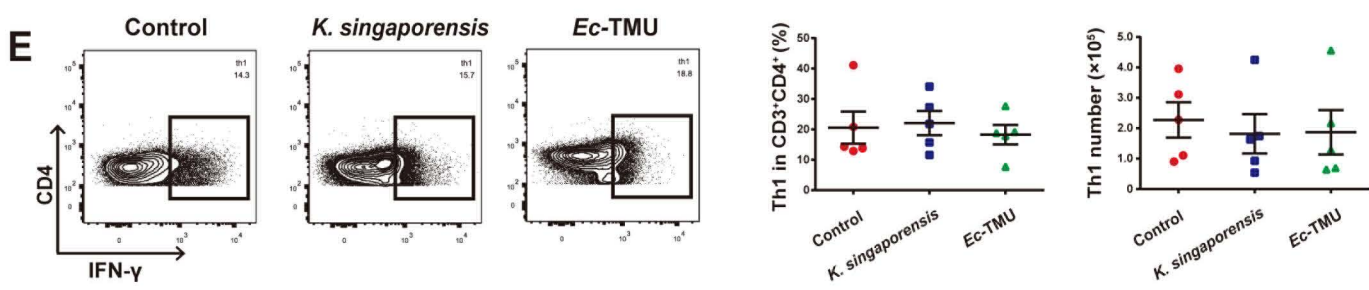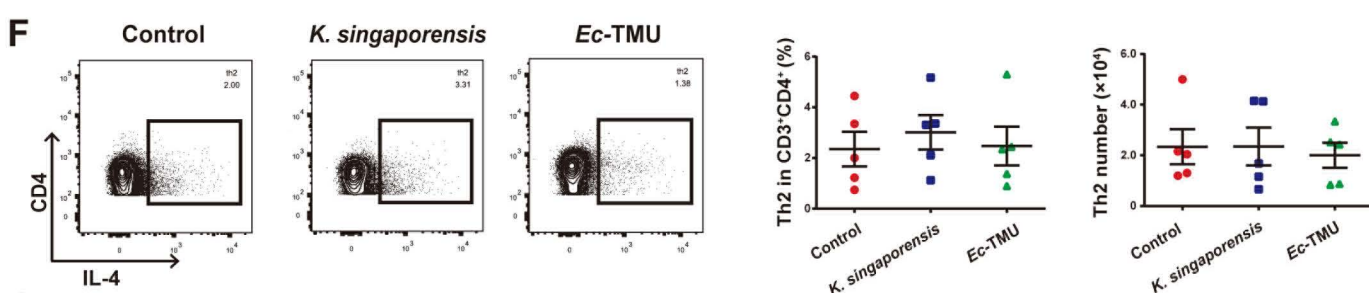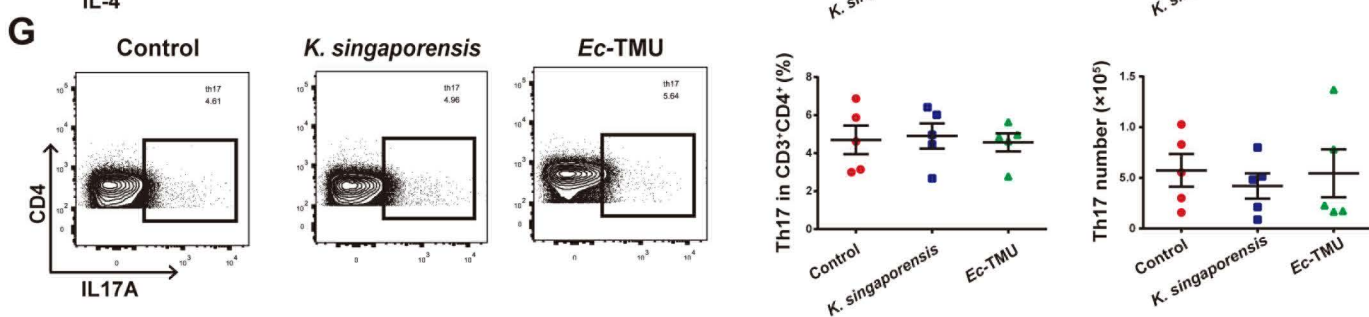

1 **Figure S4. Effect of *Ec*-TMU on immune cells in MLN in DSS-induced acute colitis.**  
2 MLN of mice (in the model of Figure 2A) from the *Ec*-TMU, *K. singaporensis* or  
3 control groups were collected, and lymphocytes were isolated, stained and analyzed by  
4 flow cytometry. (A) Gating strategy for flow cytometry analysis. (B) The percentage  
5 and number of DC. (C) The percentage and number of CD103<sup>+</sup>DCs. (D) The percentage  
6 and number of CD25<sup>+</sup>Foxp3<sup>+</sup> cells (Treg). (E) The percentage and number of IFN-  
7  $\gamma$ <sup>+</sup>CD4<sup>+</sup> cells (Th1). (F) The percentage of IL-4<sup>+</sup>CD4<sup>+</sup> cells (Th2). (G) The percentage  
8 and number of IL-17A<sup>+</sup>CD4<sup>+</sup> cells (Th17). n = 5. Data are the mean  $\pm$  SEM. One-way  
9 ANOVA.

10  
11  
12  
13  
14  
15  
16  
17  
18  
19  
20  
21  
22  
23  
24  
25

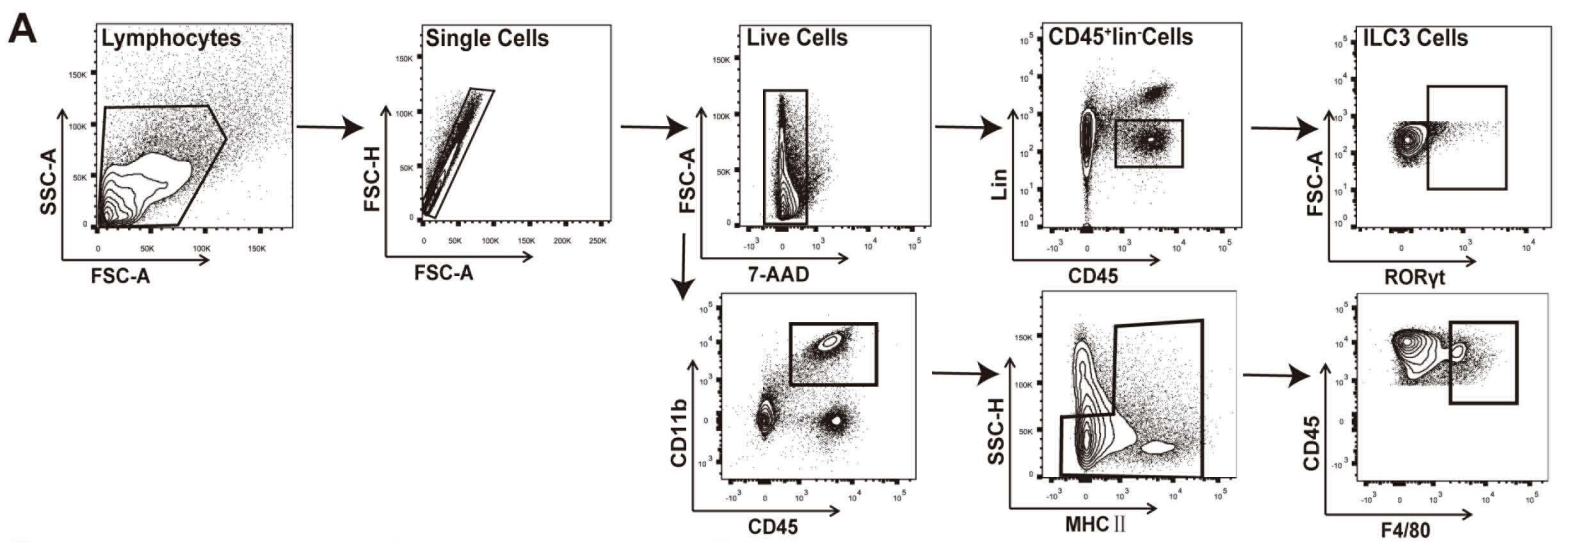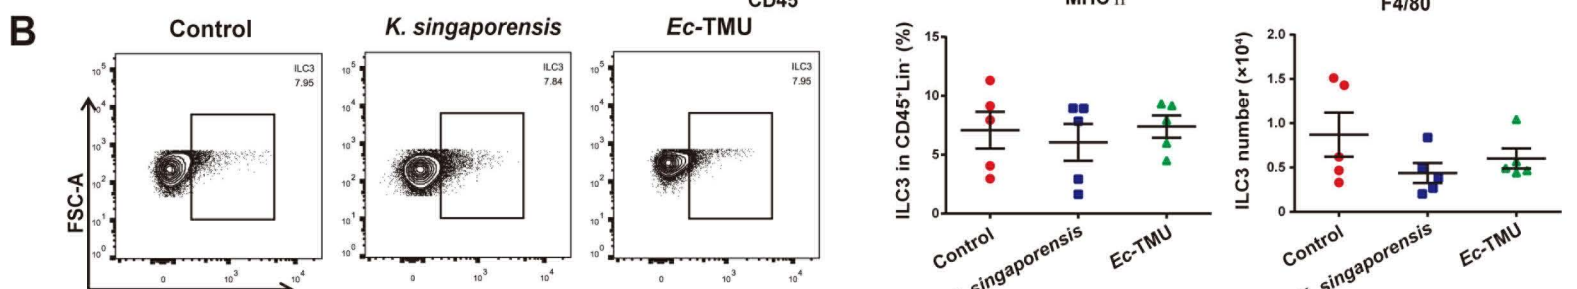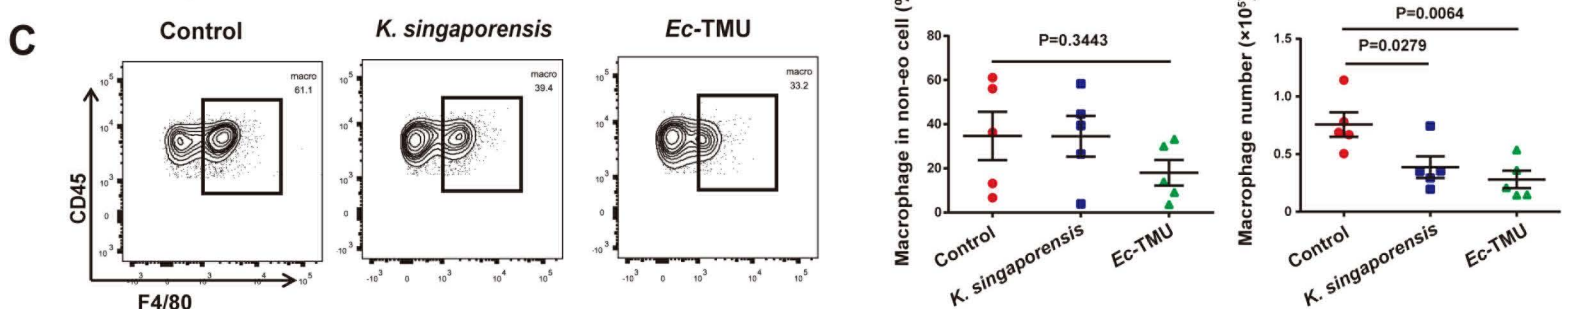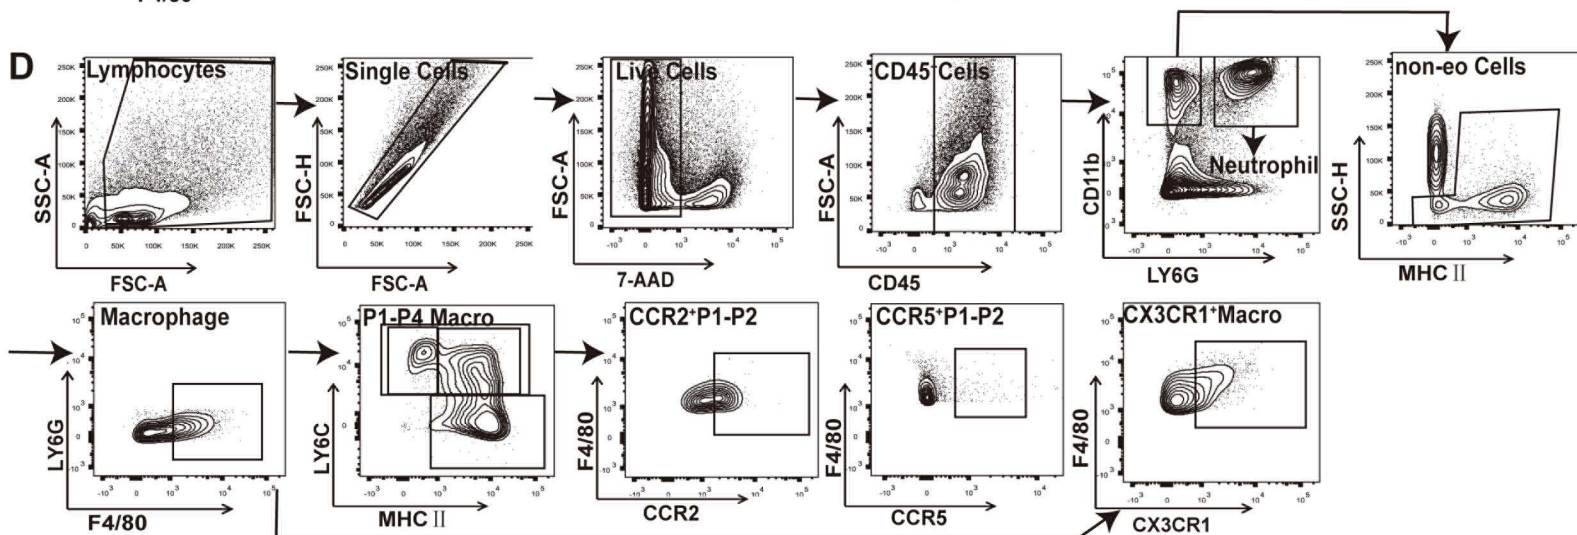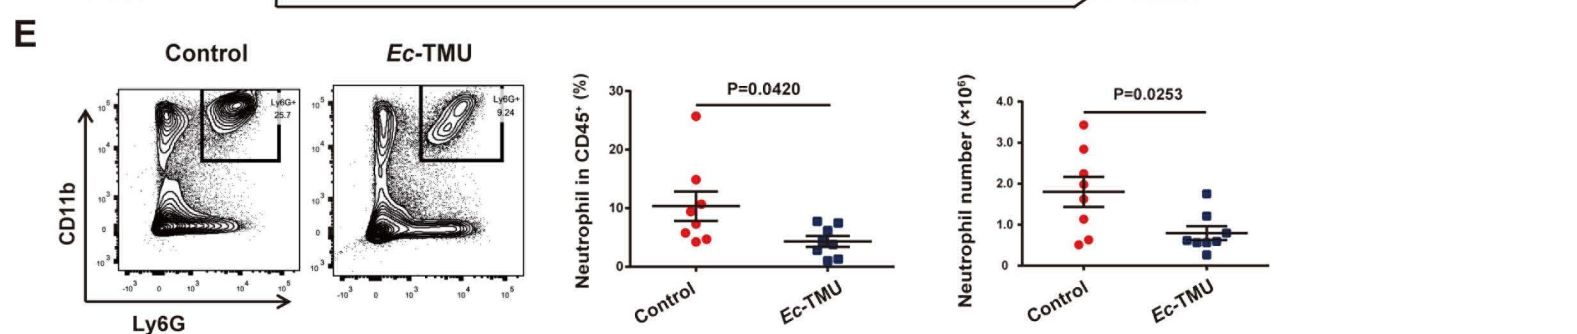

1 **Figure S5. Effect of *Ec*-TMU on immune cells in cLP in DSS-induced acute colitis.**

2 cLP of mice (in the model of Figure 2A) from the *Ec*-TMU, *K. singaporensis* or control  
3 groups were collected, and lymphocytes were isolated, stained and analyzed by flow  
4 cytometry. (A) Gating strategy for flow cytometry analysis. (B) The percentage and  
5 number of ILC3. (C) The percentage and number of macrophages. (D) Gating strategy  
6 for flow cytometry analysis of macrophage subsets. (E) The percentage and number of  
7 neutrophil cells. n = 5 (B-C), n = 8 (E). Data are the mean  $\pm$  SEM. One-way ANOVA  
8 (B-C) or unpaired Student's t test (E).

9

10

11

12

13

14

15

16

17

18

19

20

21

22

23

24

25



1 **Figure S6. *Ec*-TMU directly reduced mRNA levels of *Ccl2* and *Ccl7* in epithelial**  
2 **cells.** (A-F) BMDMs were stimulated with PBS, LPS (0.5 µg/ml), or LPS (0.5 µg/ml)  
3 in addition with *Ec*-TMU or K12 (MOI = 0.2, 1, and 5, 2 h). mRNA levels of *Ccl2* (A),  
4 *Ccl4* (B), *Ccl5* (C), *Ccl7* (D), *Ccl20* (E) and *Cxcl10* (F) were evaluated by qRT-PCR.  
5 (G-M) SW480 cells were stimulated with PBS, LPS (2.5 µg/ml), or LPS (2.5 µg/ml) in  
6 addition with *Ec*-TMU or K12 (MOI = 1, 5, 10, 3 h). mRNA levels of *Ccl2* (G), *Ccl4*  
7 (H), *Ccl5* (I), *Ccl7* (J), *Ccl8* (K), *Ccl20* (L) and *Cxcl10* (M) were evaluated by qRT-  
8 PCR. (N-O) SW480 cells were stimulated with PBS, LPS (2.5 µg/ml), or LPS (2.5  
9 µg/ml) in addition with HK bacteria (MOI = 1, 5, 10, 3 h). mRNA levels of *Ccl2* (N),  
10 *Ccl7* (O) were evaluated by qRT-PCR. (P-Q) SW480 cells were stimulated with PBS,  
11 LPS (10 µg/ml) in addition with different fractions separated from BHI, *Ec*-TMU, or  
12 *K12* culture supernatant. mRNA levels of *Ccl2* (P) and *Ccl7* (Q) in SW480 cells were  
13 evaluated by qRT-PCR. (R) Principal component analysis (PCA) score plots of  
14 metabolites (<3 kDa) from *Ec*-TMU culture supernatant, *K12* culture supernatant, or  
15 BHI. (S-U) SW480 cells were stimulated with LPS (6 µg/ml), in addition with DMSO,  
16 10 µM or 50 µM HPLA (S), 5-MTP (T), HPLA (U) for 6 h, and mRNA levels of *Ccl2*  
17 and *Ccl7* were evaluated using qRT-PCR. n = 4 (A-Q, S-U). Data are the mean ±SEM.  
18 One-way ANOVA (A-Q, S-U).

19  
20  
21  
22  
23  
24  
25

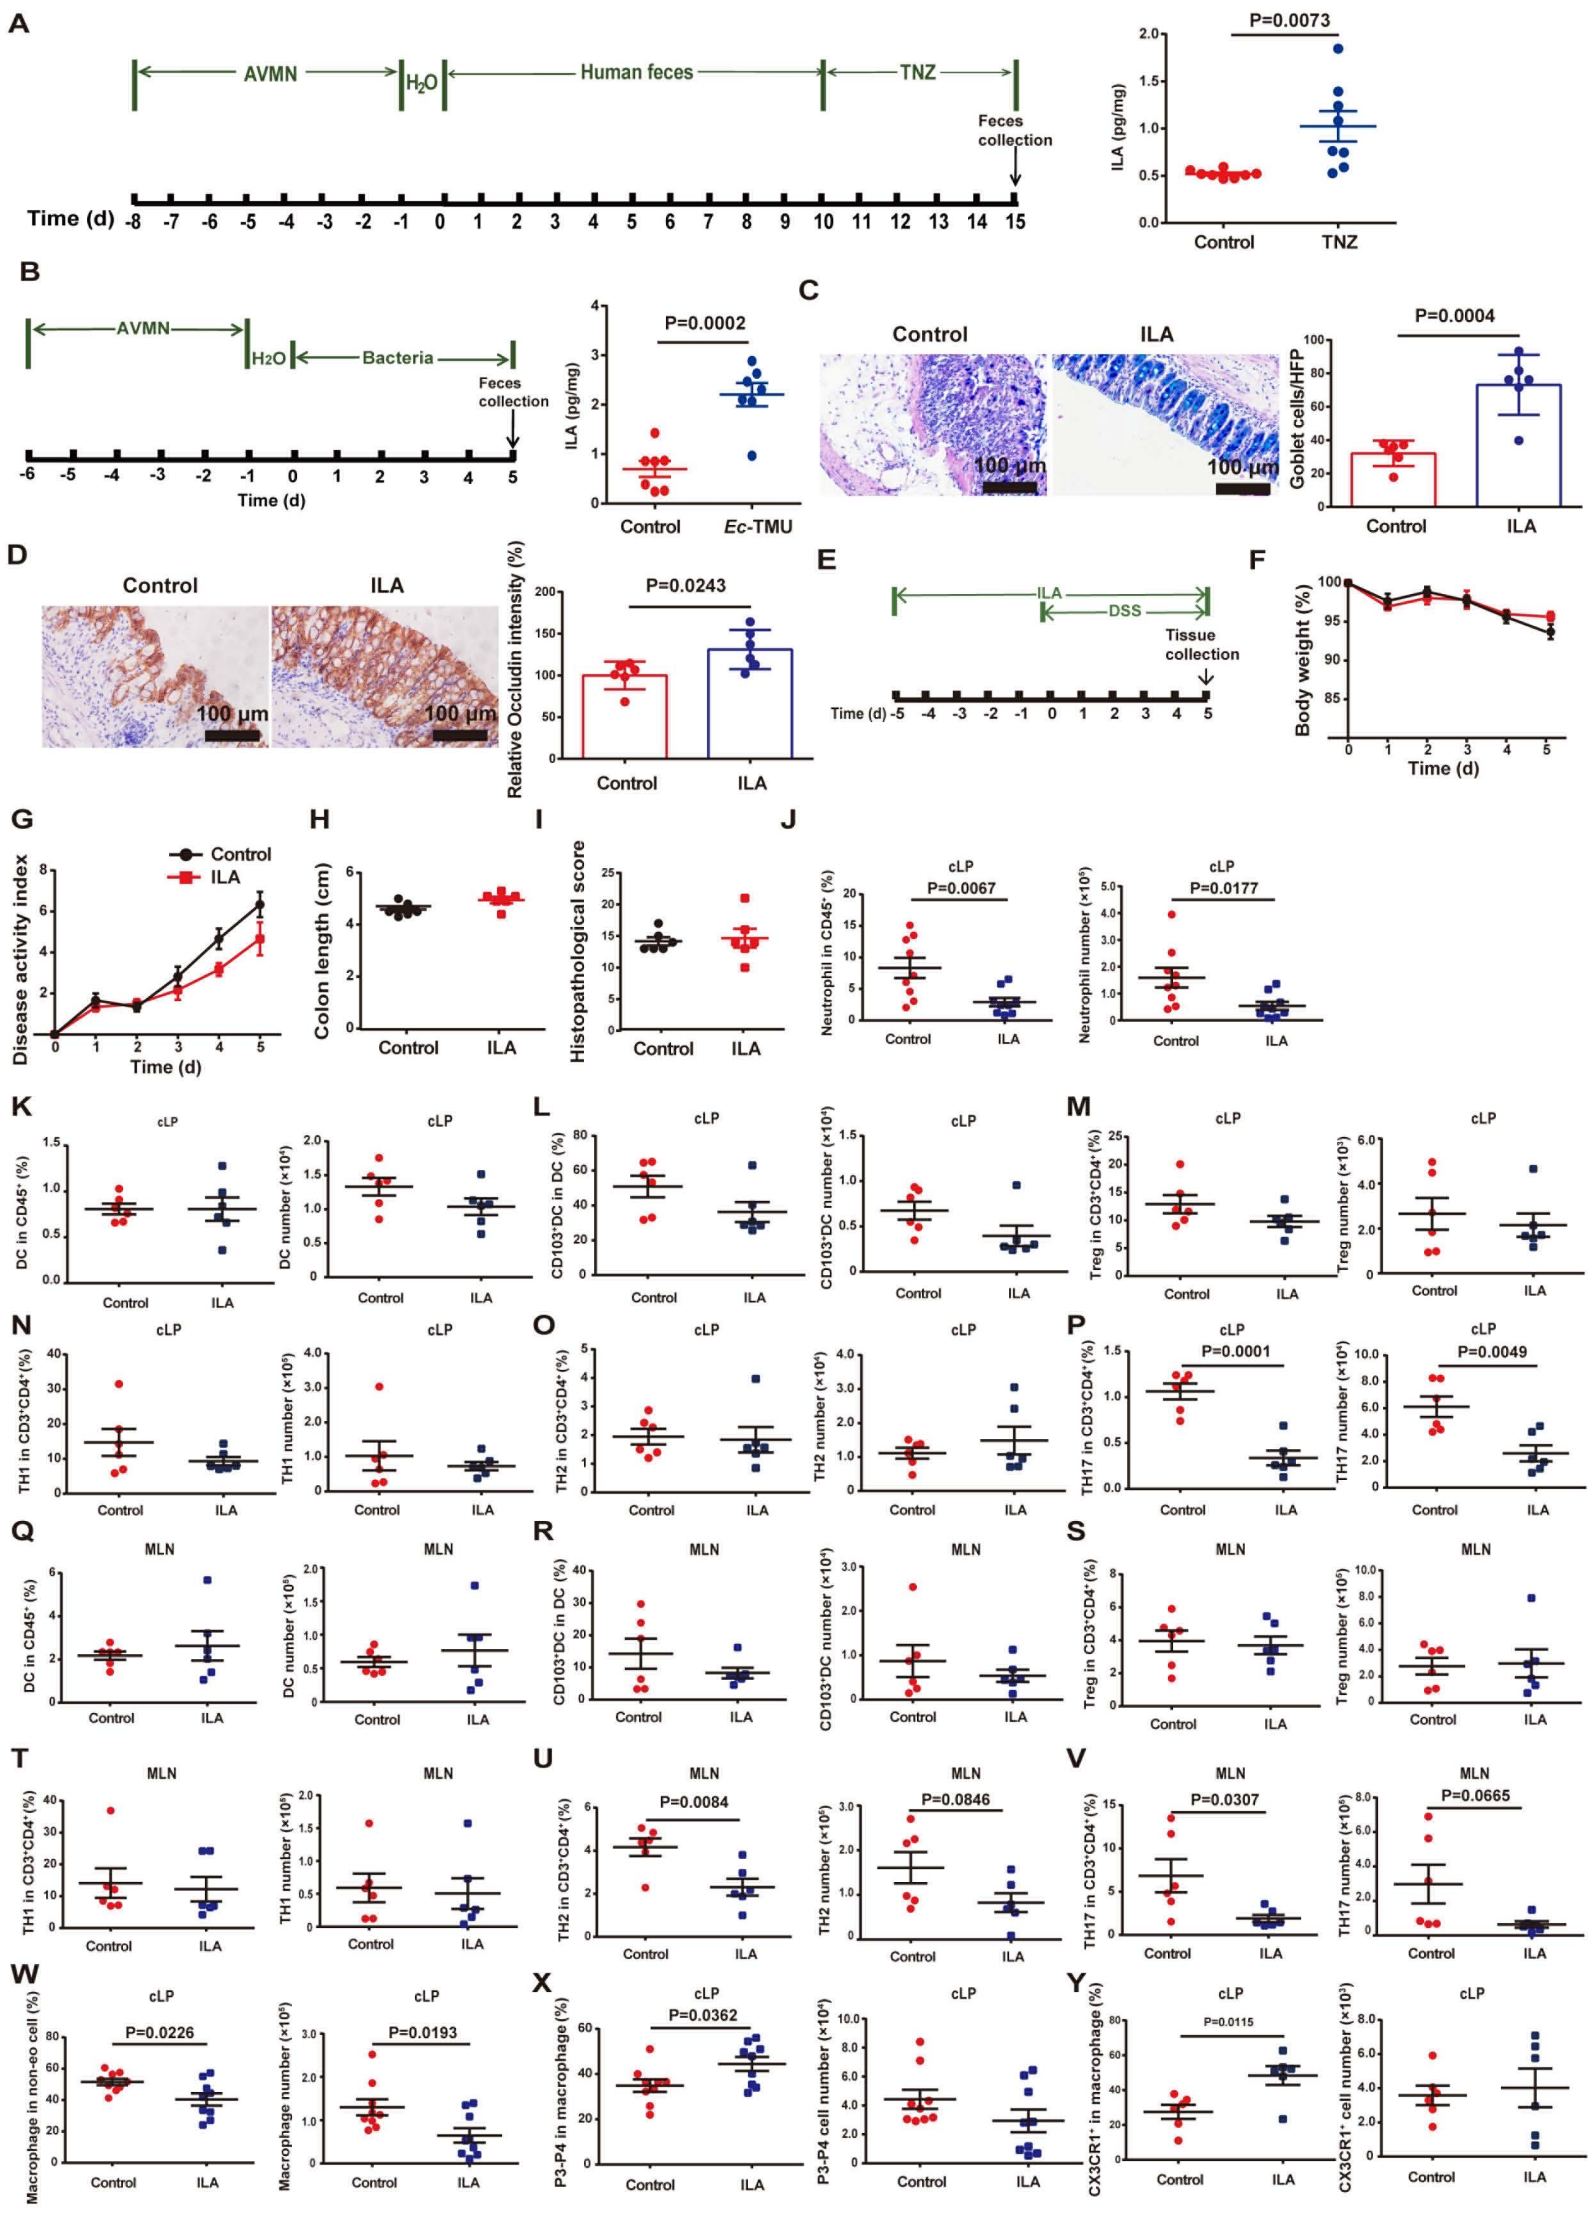



1 **Figure S7. The effect of ILA on intestinal immune cells.** (A) Schematic diagram for  
2 the mouse model to detect the effect of TNZ treatment on ILA content in mouse feces.  
3 ILA levels in the feces from mice treated with water or TNZ. (B) Schematic diagram  
4 for the mouse model to detect the effect of *Ec*-TMU treatment on ILA content in mouse  
5 feces. ILA levels in the feces from mice treated with PBS or *Ec*-TMU. (C-D)  
6 Representative goblet cells (C) and Occludin (D) staining and quantitation in colon  
7 sections. (E) Schematic diagram for the mouse model to detect the prophylactic effect  
8 of ILA on DSS-induced acute colitis. Mice were gavaged daily with ILA (40 mg/kg) or  
9 sterile water for five days. After five days of ILA administration, mice were given 2.5 %  
10 DSS simultaneously to induce colitis in addition with ILA administration for another 5  
11 days, and mice were euthanized. (F-I) Analysis of body weight (F), disease activity  
12 index (G), colon length (H) and histopathological scores (I) in each group. (J-Y). MLN  
13 and cLP of mice (in the model of Figure 5I) from the ILA or control groups were  
14 collected, and lymphocytes were isolated, stained and analyzed by flow cytometry. (J)  
15 The percentage and number of neutrophils in the cLP. (K) The percentage and number  
16 of DCs in the cLP. (L) The percentage and number of CD103<sup>+</sup>DCs in the cLP. (M) The  
17 percentage and number of Tregs in the cLP. (N) The percentage and number of IFN-  
18  $\gamma$ <sup>+</sup>CD4<sup>+</sup> cells (Th1) in the cLP. (O) The percentage and number of IL-4<sup>+</sup>CD4<sup>+</sup> cells (Th2)  
19 in the cLP. (P) The percentage and number of IL-17A<sup>+</sup>CD4<sup>+</sup> cells (Th17) in the cLP.  
20 (Q) The percentage and number of DCs in the MLN. (R) The percentage and number  
21 of CD103<sup>+</sup>DCs in the MLN. (S) The percentage and number of Tregs in the MLN. (T)  
22 The percentage and number of IFN- $\gamma$ <sup>+</sup>CD4<sup>+</sup> cells (Th1) in the MLN. (U) The percentage  
23 and number of IL-4<sup>+</sup>CD4<sup>+</sup> cells (Th2) in the MLN. (V) The percentage and number of  
24 IL-17A<sup>+</sup>CD4<sup>+</sup> cells (Th17) in the MLN. (W) The percentage and number of  
25 macrophages. (X) The percentage and number of anti-inflammatory (P3-P4)

1 macrophages. (Y) The percentage and number of CX3CR1<sup>+</sup> macrophages. n = 8 (A), n  
2 = 7 (B), n = 6 (C-D, F-I, K-V, Y) and n = 9 (J, W-X). Data are the mean ±SEM. Unpaired  
3 Student's t test (A-D, H-Y) or two-way ANOVA (F-G).

4  
5  
6  
7  
8  
9  
10  
11  
12  
13  
14  
15  
16  
17  
18  
19  
20  
21  
22  
23  
24  
25

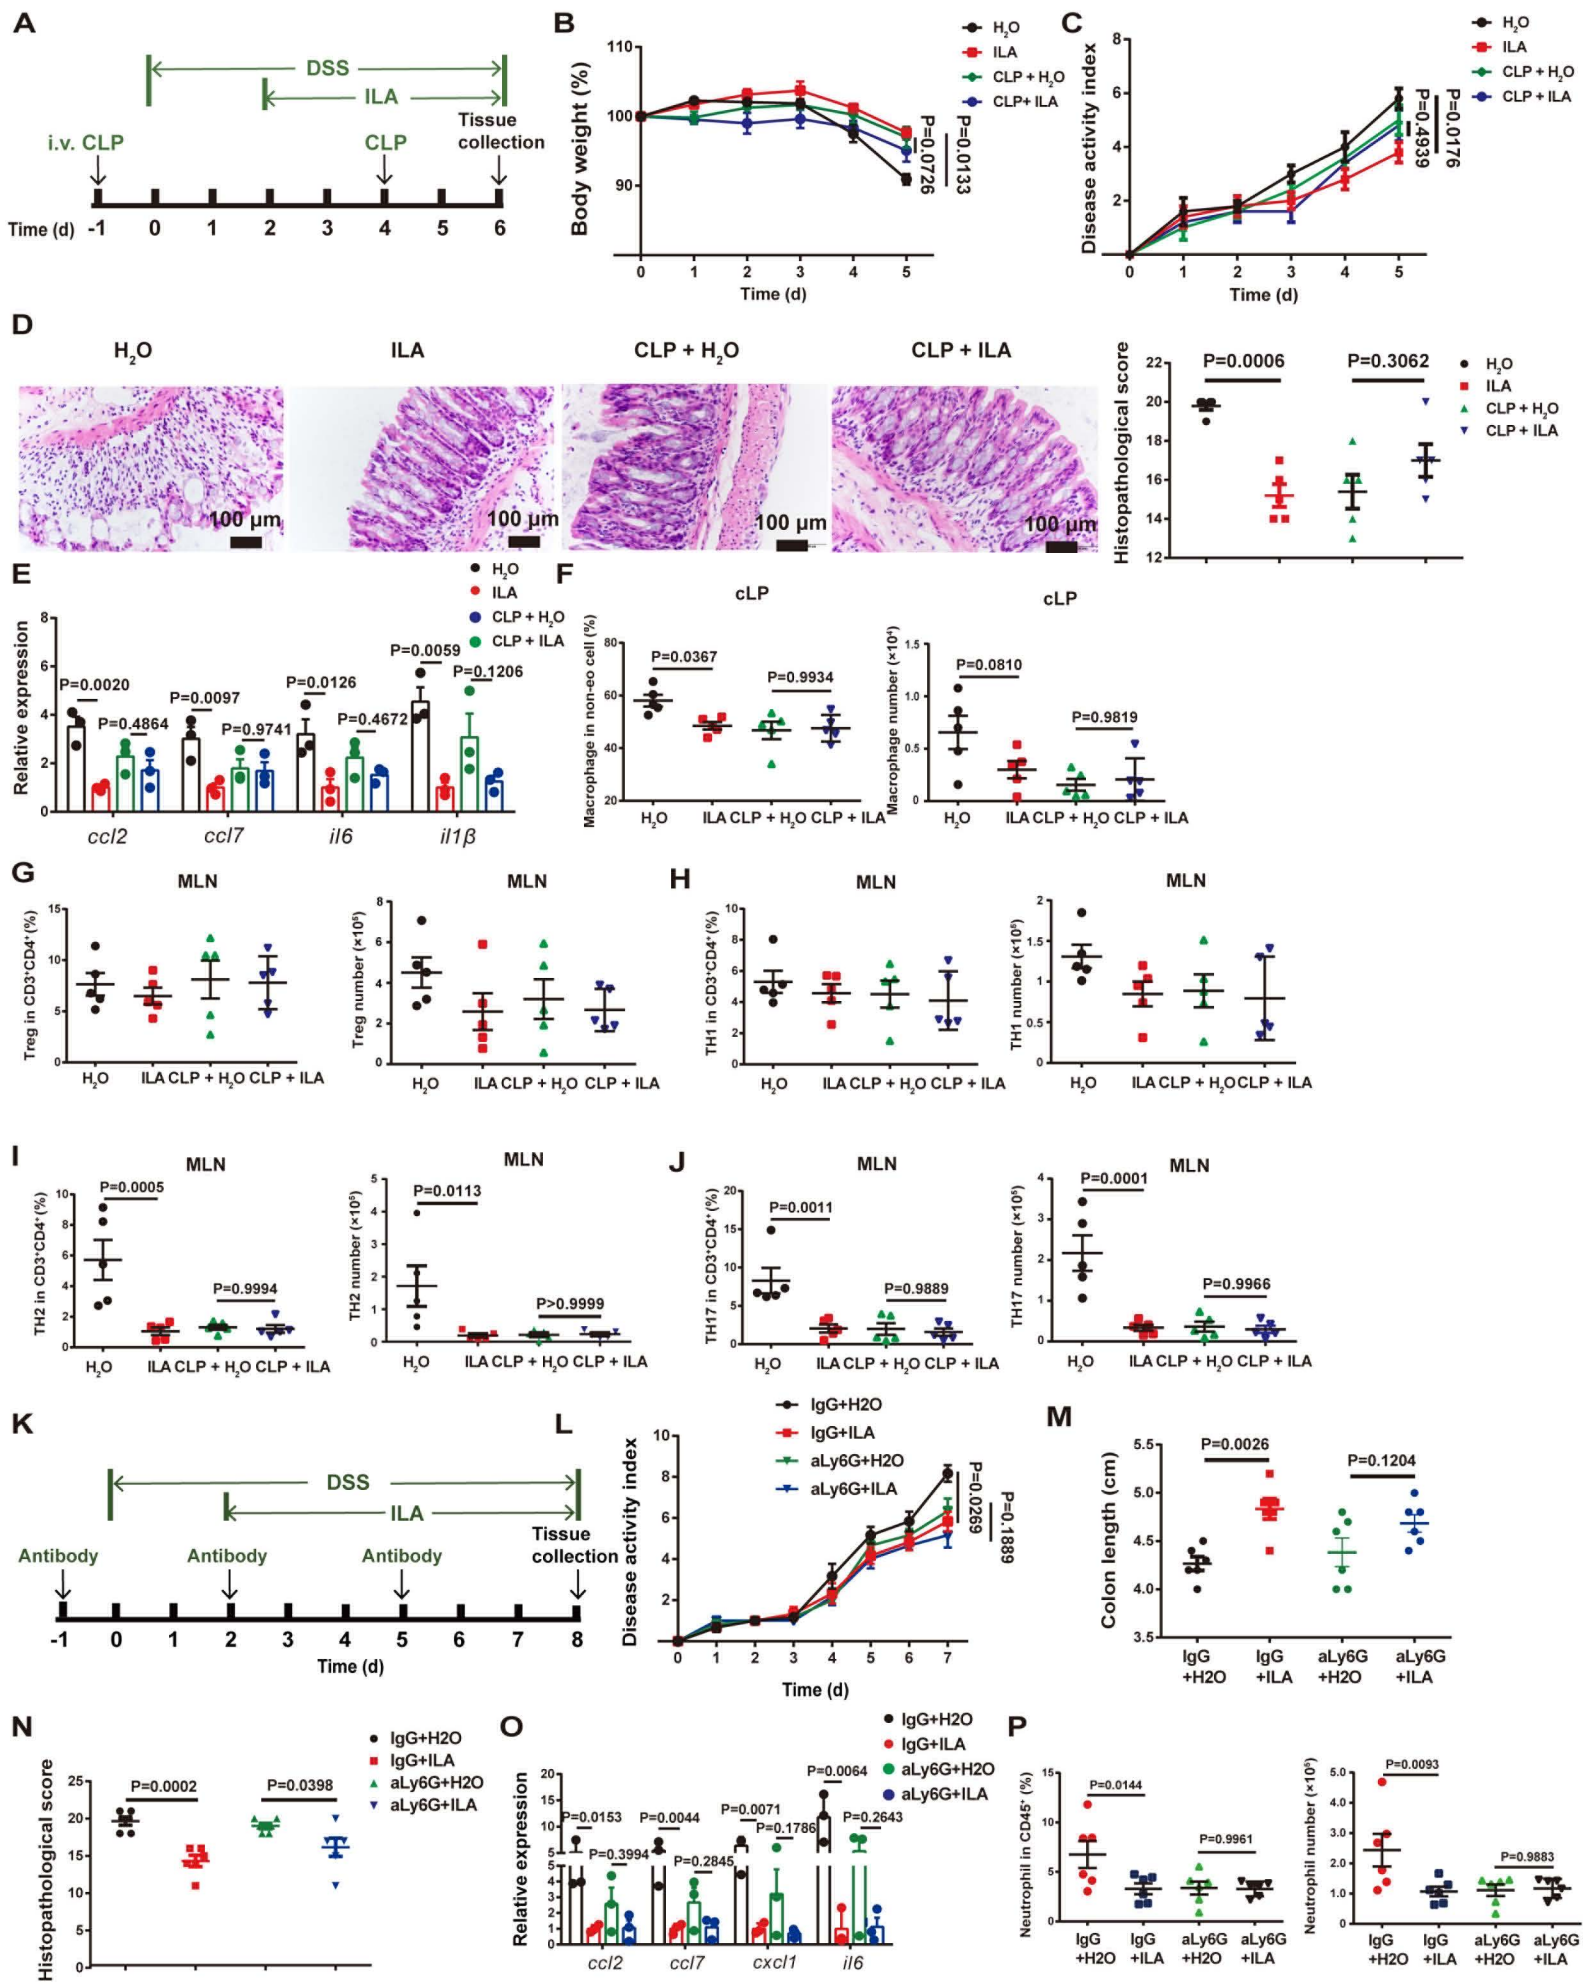

1 **Figure S8. The effect of ILA on DSS-colitis after macrophage or neutrophile**  
2 **deletion.** (A) Schematic diagram for the mouse model of DSS-induced colitis combined  
3 with ILA and chlorophosphate liposomes (CLP) injection. After injected intravenously  
4 with chlorophosphate liposome or control liposome, mice were given 2.5% DSS for 6  
5 days. After two days of DSS administration, mice were daily gavaged with sterile water  
6 or 40 mg/kg ILA. Mice were treated with CLP or PBS liposomes again on day 4. (B–  
7 D) Analysis of body weight (B), disease activity index (C), and histopathological scores  
8 (D) in each group. (E) mRNA expression levels of inflammatory cytokines in the colons.  
9 (F) The percentage and number of macrophages. (G) The percentage and number of  
10 Tregs. (H) The percentage of IFN- $\gamma$ <sup>+</sup>CD4<sup>+</sup> cells (Th1). (I) The percentage and number  
11 of IL-4<sup>+</sup>CD4<sup>+</sup> cells (Th2). (J) The percentage and numbers of IL-17A<sup>+</sup>CD4<sup>+</sup> cells  
12 (Th17). (K) Schematic diagram for the mouse model of DSS-induced colitis combined  
13 with ILA and Ly6G neutralizing antibody (aLy6G) injection. After injected  
14 intravenously with aLy6G or IgG, mice were given 2.5% DSS for 6 days. After two  
15 days of DSS administration, mice were daily gavaged with sterile water or 40 mg/kg  
16 ILA. Mice were treated with aLy6G or IgG again on day 2 and 5. (L–N) Analysis of  
17 disease activity index (L), colon length (M) and histopathological scores (N) in each  
18 group. (O) mRNA expression levels of inflammatory cytokines in the colons. (P) The  
19 percentage and number of neutrophils. n = 5 (B-D, F-J), n = 6 (L-N, P) and n = 3 (E,  
20 O). Data are the mean  $\pm$  SEM, two-way ANOVA (B-C, L) or one-way ANOVA (D-J,  
21 M-P).

22

23

24

25



1 **Figure S9. The role of CCR2<sup>+</sup> macrophages in ILA's effect on DSS-colitis.** (A)  
2 Schematic diagram for the mouse model to examine the role of CCR2<sup>+</sup> macrophages in  
3 ILA inhibition of colitis. (B-D) Analysis of disease activity index (B), colon length (C)  
4 and histopathological scores (D). (E-H) Stool samples from mice treated with sterile  
5 water or ILA (in the model of Fig. 5I) were collected and analyzed by 16S rRNA gene  
6 sequencing. (E) Shannon diversity index of the microbiota. (F) PCoA results based on  
7 unweighted UniFrac distances. (G) Relative abundance of bacteria by taxon-based  
8 analyses. (H) Heatmap to visualize the relative abundances of the 30 most predominant  
9 bacterial genera. n = 5 (B-D), n = 5 (E-H). Data are the mean ± SEM, two-way ANOVA  
10 (B), one-way ANOVA (C-D) or unpaired Student's t test (E).

11  
12  
13  
14  
15  
16  
17  
18  
19  
20  
21  
22  
23  
24  
25

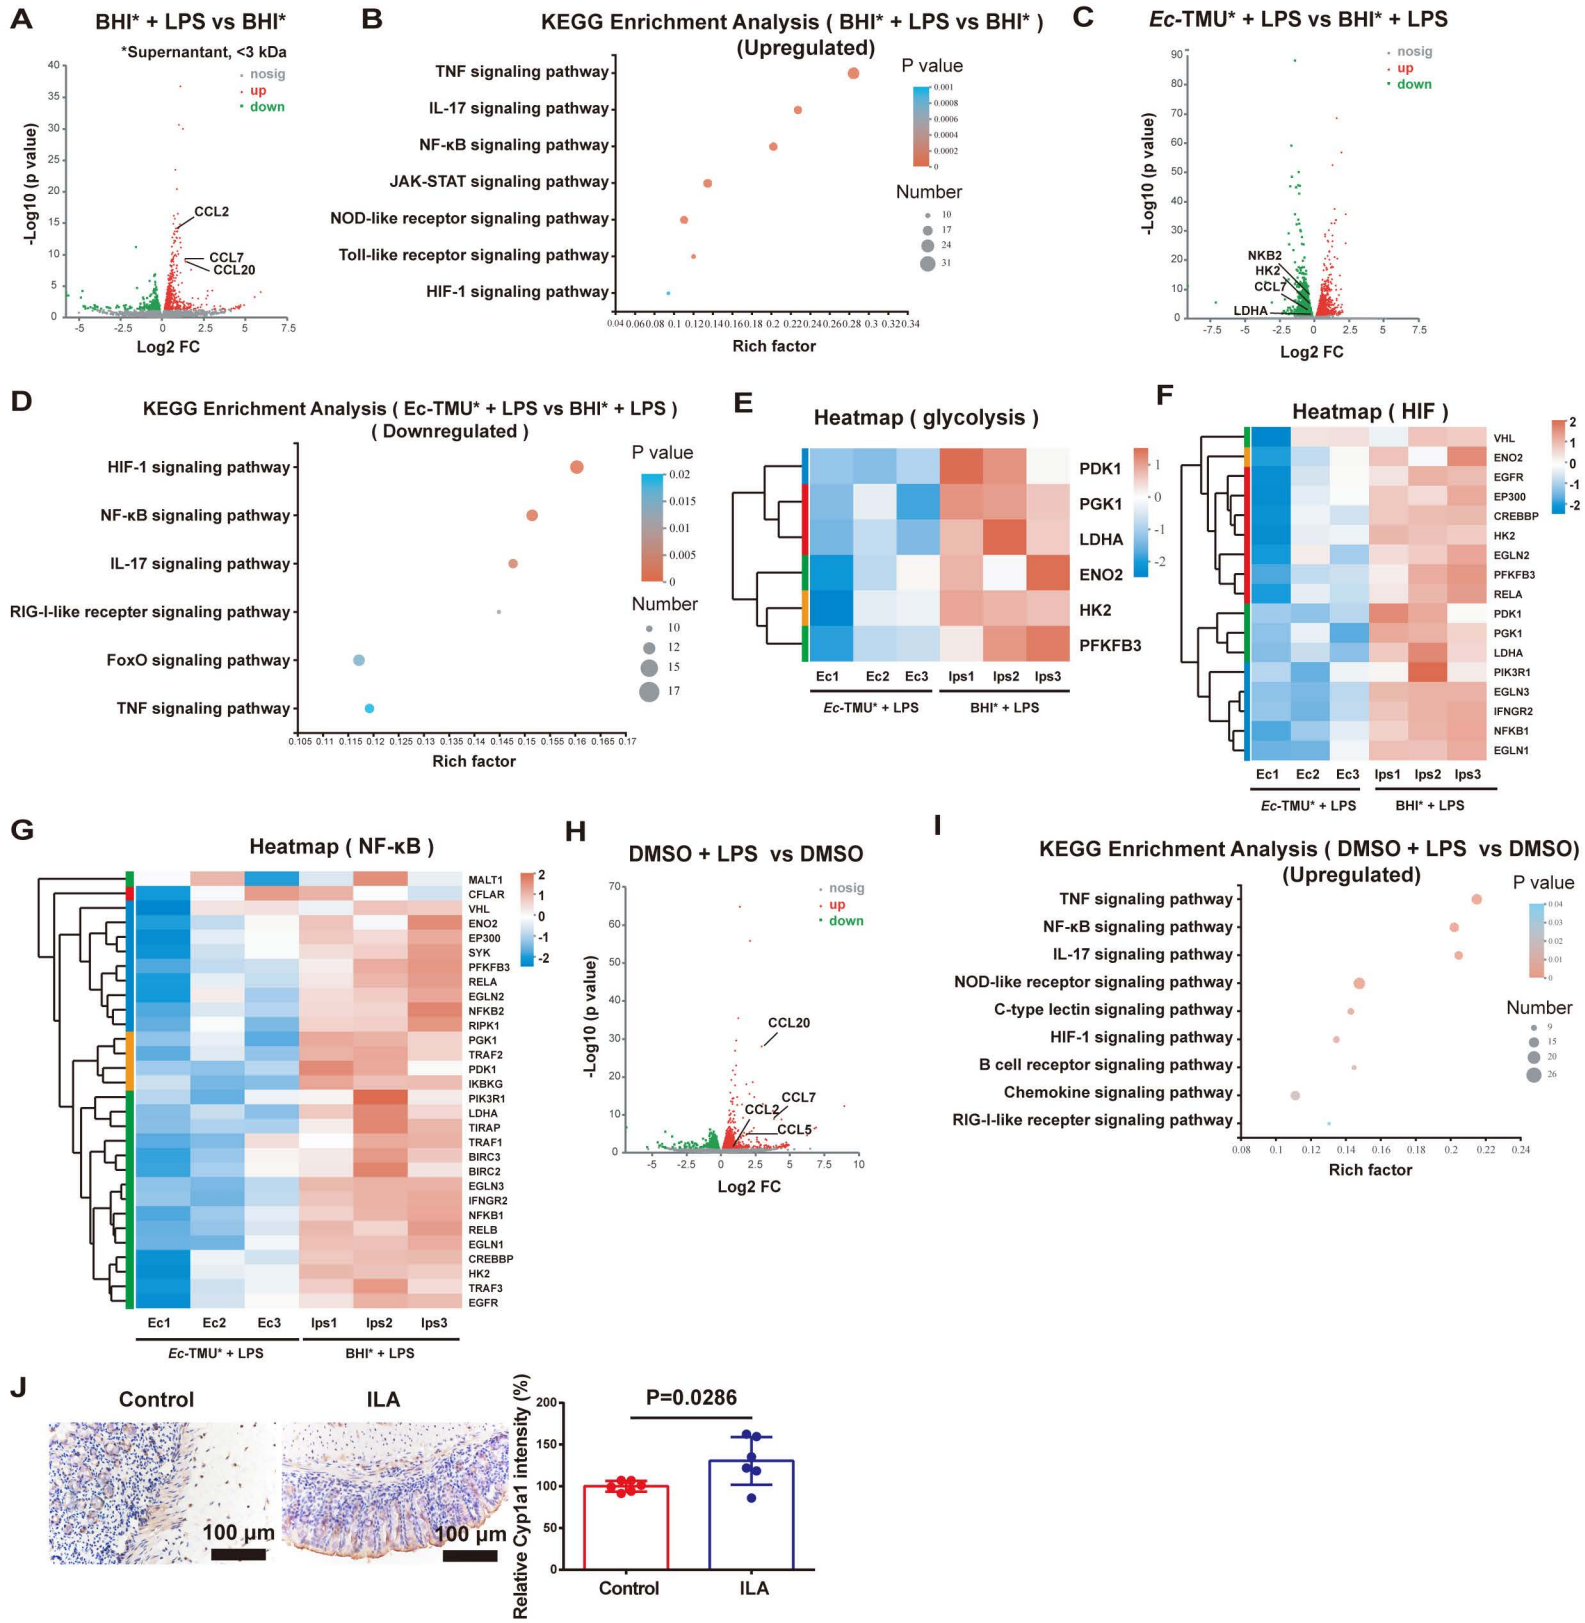

1 **Figure S10. *Ec*-TMU culture supernatant (<3 kDa) downregulates the HIF, NF-κB**  
2 **pathway and glycolysis in epithelial cells.** (A-I) SW480 cells were stimulated with  
3 BHI, or LPS (10 µg/ml) in addition with BHI or *Ec*-TMU culture supernatant (750 µl,  
4 <3 kDa) for 3 h. (A and C) The volcano plot showing the upregulated and  
5 downregulated genes in SW480 cells treated with LPS, compared with BHI (A), or the  
6 upregulated and downregulated genes in SW480 cells treated with LPS plus *Ec*-TMU  
7 supernatant (<3 kDa), compared with LPS (C). (B and D) KEGG analyses of the  
8 upregulated pathways in SW480 cells treated with LPS, compared with BHI (B), or the  
9 upregulated pathways in SW480 cells treated with LPS plus *Ec*-TMU supernatant (<3  
10 kDa), compared with LPS (D). (E-G) Heatmap depiction of gene expression involved  
11 in of glycolysis (E), HIF (F) and NF-κB (G) signaling pathway. (H) Volcano plot  
12 showing the upregulated and downregulated genes in SW480 cells treated with LPS,  
13 compared with PBS. (I) KEGG analysis showing the upregulated pathways in SW480  
14 cells treated with LPS, compared with DMSO. (J) Representative CYP1A1 staining and  
15 quantitation in colon sections (in the model of Figure 5I). n=3 (A-I), n = 6 (J). Data are  
16 the mean ± SEM. Unpaired Student' s t test (J).

17  
18  
19  
20  
21  
22  
23  
24



**Table S1. Reagent and resource used in this study**

| REAGENT or RESOURCE                       | SOURCE                       | IDENTIFIER                            |
|-------------------------------------------|------------------------------|---------------------------------------|
| <b>Antibodies</b>                         |                              |                                       |
| Anti-mouse CD45-PE-Cy7                    | eBioscience                  | Cat# 25-0451-82; RRID: AB_2734986     |
| Anti-mouse CD11c-APC                      | Biolegend                    | Cat# 117309; RRID: AB_313778          |
| Anti-mouse MHCII-PE                       | Biolegend                    | Cat# 107607 RRID: AB_313322           |
| Anti-mouse CD103-PerCP/Cy5.5              | eBioscience                  | Cat# 46-1031-82; RRID: AB_2573704     |
| Anti-mouse CD4-APC-Cy7                    | Biolegend                    | Cat# 100414; RRID: AB_312699          |
| Anti-mouse CD3-FITC                       | Biolegend)                   | Cat# 100204; RRID: AB_312661          |
| Anti-mouse CD4-PE-Cy7                     | eBioscience                  | Cat# 25-0041-81; RRID: AB_469575      |
| Anti-mouse CD25-PE                        | Biolegend                    | Cat# 102008; RRID: AB_312857          |
| Anti-mouse CD45-eFlour 506                | Invitrogen                   | Cat# 69-0451-82; RRID: AB_2637147     |
| Anti-mouse CD11b-PE-Cy7                   | Invitrogen                   | Cat# 25-0112-81; RRID: AB_469587      |
| Anti-mouse Ly6G-APC                       | Biolegend                    | Cat# 127614; RRID: AB_2227348         |
| Anti-mouse F4/80-FITC                     | eBioscience                  | Cat# 11-4801-85; RRID: AB_2637192     |
| Anti-mouse MHCII- Alexa Fluor 700         | Biolegend                    | Cat# 107622; RRID: AB_493727          |
| Anti-mouse CCR2-Brilliant Violet 421      | Biolegend                    | Cat# 150605; RRID: AB_2571913         |
| Anti-mouse CCR5- Brilliant Violet 506     | eBioscience                  | Cat# 743697; RRID: AB_2741679         |
| Anti-mouse Lin-FITC                       | Invitrogen                   | Cat# 22-7770-72; RRID: AB_2644066     |
| Anti-mouse CX3CR1-PE/Dazzle               | Biolegend                    | Cat# 149013; RRID: AB_2565697         |
| Anti-mouse ROR $\gamma$ t-APC             | eBioscience                  | Cat# 17-6981-82; RRID: AB_2573254     |
| Anti-mouse Foxp3-APC                      | Biolegend                    | Cat# 320014; RRID: AB_439750          |
| Anti-mouse IL-17A-PE-Cy7                  | eBioscience                  | Cat# 25-7177-80; RRID:<br>AB_10717952 |
| Anti-mouse IFN- $\gamma$ -PerCP/Cy5.5     | Biolegend                    | Cat# 505821; RRID: AB_961361          |
| CCL2 antibody                             | Proteintech                  | Cat# 66272-1-Ig                       |
| Alexa Fluor 594 - labeled second antibody | Proteintech                  | Cat# SA00013-4                        |
| Epcam antibody                            | Proteintech                  | Cat# 21050-1-AP                       |
| Alexa Fluor 488 - labeled second antibody | Proteintech                  | Cat# SA00013-2                        |
| CCL7 antibody                             | Bioss                        | Cat# bs-1987R                         |
| Muc2 antibody                             | Proteintech                  | Cat# 27675-1-AP                       |
| Ki67 antibody                             | Abcam                        | Cat# ab264429                         |
| Lgr5 antibody                             | Affinity                     | Cat# DF2816                           |
|                                           | Biosciences                  |                                       |
| Caspase3 antibody                         | Cell Signaling<br>Technology | Cat# 9664                             |
| Occludin antibody                         | Abcam                        | Cat# ab216327                         |
| p-I $\kappa$ B $\alpha$ antibody          | Affinity                     | Cat# AF2002                           |
|                                           | Biosciences                  |                                       |
| HIF1A antibody                            | Affinity                     | Cat# AF1009                           |
|                                           | Biosciences                  |                                       |
| I $\kappa$ B $\alpha$ antibody            | Abcam                        | Cat# ab32518                          |
| $\beta$ -actin antibody                   | Abcam                        | Cat# ab6276                           |
| Chemiluminescent HRP Substrate            | Merck Millipore              | Cat# WBKLS                            |

|                                |                         |              |
|--------------------------------|-------------------------|--------------|
| Cyp1A1 antibody                | Affinity<br>Biosciences | Cat# AF5312  |
| IgG2a isotype control          | BioXcell                | Cat# BE0089  |
| anti-mouse Ly6G                | BioXcell                | Cat# BE0075  |
| HRP-labeled secondary antibody | Zsbio                   | Cat# PV-6001 |

---

**Chemicals, Peptides, and Recombinant Proteins**

---

|                                       |                     |                   |
|---------------------------------------|---------------------|-------------------|
| murine M-CSF                          | Peprotech           | Cat# 315-02-50    |
| Ampicillin                            | Sangon Biotech      | Cat# A610028-0025 |
| Metronidazole                         | Sangon Biotech      | Cat# A600633-0025 |
| Neomycin                              | Sangon Biotech      | Cat# A610366-0025 |
| Vancomycin                            | Sangon Biotech      | Cat# A600983-0001 |
| DSS                                   | MP Biomedicals      | Cat# 0216011090   |
| tinidazole                            | Proteintech         | Cat# CM00694      |
| FITC-dextran                          | Sigma               | Cat# 46944        |
| PBS                                   | Solarbio            | Cat# P1020        |
| LPS                                   | Sigma               | Cat# L2880        |
| DMSO                                  | Solarbio            | Cat# D8372        |
| DTT                                   | Solarbio            | Cat# D1070        |
| Collagenase IV                        | Sigma               | Cat# C5138        |
| Percoll                               | GE                  | Cat# 17-0891-01   |
| ILA                                   | Med Chem<br>Express | Cat# HY-113099    |
| HPLA                                  | Med Chem<br>Express | Cat# HY-113219    |
| 5-MTP                                 | Sigma-Aldrich       | Cat# M4001        |
| KynA                                  | Med Chem<br>Express | Cat# HY-100806    |
| DCA                                   | Sigma-Aldrich       | Cat# 347795       |
| CH-223191                             | Med Chem<br>Express | Cat# HY-12684     |
| BAY 11-7082                           | Med Chem<br>Express | Cat# HY-10257     |
| PX-478                                | Med Chem<br>Express | Cat# HY-10231     |
| oligomycin                            | Med Chem<br>Express | Cat# HY-16589     |
| Phorbol 12-myristate 13-acetate (PMA) | Med Chem<br>Express | Cat# HY-18739     |
| ML228                                 | Med Chem<br>Express | Cat# HY-10231     |

|                                                             |                                                          |                  |
|-------------------------------------------------------------|----------------------------------------------------------|------------------|
| HiFiScript cDNA Synthesis Kit                               | CWBio                                                    | Cat# CW2569M     |
| Ultra SYBR Mixture                                          | CWBio                                                    | Cat# CW0957M     |
| RIPA lysis buffer                                           | Solarbio                                                 | Cat# R0020       |
| Complete mini-EDTA-free protease inhibitor cocktail tablets | Roche                                                    | Cat# 11697498001 |
| PhosSTOP™ Phosphatase inhibitors                            | Roche                                                    | Cat# 04906837001 |
| OCT                                                         | Sakura                                                   | Cat# 4583        |
| diaminobenzidine chromogenic substrate                      | Zsbio                                                    | Cat# ZLI-9017    |
| <b>Critical Commercial Assays</b>                           |                                                          |                  |
| E.Z.N.A.® soil DNA Kit                                      | Omega Bio-tek                                            | Cat# D4015-02    |
| Bacterial Genomic DNA Extraction Kit                        | TIANGEN                                                  | Cat# DP302-02    |
| ILA assay kit                                               | Jiangsu Meimian Industrial                               | Cat# MM-46497M2  |
| PBS and clodronate liposomes                                | Target Technology                                        | Cat# CP-005-005  |
| Foxp3/transcription factor staining buffer sets             | eBioscience                                              | Cat# 00-5523-00  |
| Cell activation cocktail with Brefeldin A                   | Biolegend                                                | Cat# 423303      |
| Zombie NIRT™ Fixable Viability Kit                          | Biolegend                                                | Cat# 423105      |
| fixation buffer                                             | Biolegend                                                | Cat# 420801      |
| intracellular staining permeabilization wash buffer         | Biolegend                                                | Cat# 421002      |
| Lactate assay kit                                           | Sigma-Aldrich                                            | Cat# MAK064      |
| <b>Experimental Models: Organisms/Strains</b>               |                                                          |                  |
| C57BL/6J (WT)                                               | Academy of Military Medical Science (China)              | N/A              |
| C57BL/6J (Germ-free)                                        | GemPharmatech (China)                                    | N/A              |
| C57BL/6J (Ccr2-KO)                                          | GemPharmatech (China)                                    | N/A              |
| <i>E. coli</i> K12                                          | Beijing Dingguo Biotechnology Development Center (China) | N/A              |
| SW480 cell line                                             | ATCC                                                     | Cat# ccl-228     |
| <b>Oligonucleotides</b>                                     |                                                          |                  |
| Mouse- <i>Ccl2</i> F:<br>TTAAAAACCTGGATCGGAACCAA            | Sangon Biotech                                           | Custom made      |
| Mouse- <i>Ccl2</i> R:<br>GCATTAGCTTCAGATTACGGGT             | Sangon Biotech                                           | Custom made      |
| Mouse- <i>Ccl4</i> F:<br>TTCCTGCTGTTTCTCTTACACCT            | Sangon Biotech                                           | Custom made      |
| Mouse- <i>Ccl4</i> R:                                       | Sangon Biotech                                           | Custom made      |

|                          |                |             |
|--------------------------|----------------|-------------|
| CTGTCTGCCTCTTTTGGTCAG    |                |             |
| Mouse- <i>Ccl5</i> F:    | Sangon Biotech | Custom made |
| GCTGCTTTGCCTACCTCTCC     |                |             |
| Mouse- <i>Ccl5</i> R:    | Sangon Biotech | Custom made |
| TCGAGTGACAAACACGACTGC    |                |             |
| Mouse- <i>Ccl7</i> F:    | Sangon Biotech | Custom made |
| GCTGCTTTTCAGCATCCAAGTG   |                |             |
| Mouse- <i>Ccl7</i> R:    | Sangon Biotech | Custom made |
| CCAGGGACACCGACTACTG      |                |             |
| Mouse- <i>Ccl20</i> F:   | Sangon Biotech | Custom made |
| GCCTCTCGTACATACAGACGC    |                |             |
| Mouse- <i>Ccl20</i> R:   | Sangon Biotech | Custom made |
| CCAGTTCTGCTTTGGATCAGC    |                |             |
| Mouse- <i>Cxcl10</i> F:  | Sangon Biotech | Custom made |
| CCAAGTGCTGCCGTCATTTTC    |                |             |
| Mouse- <i>Cxcl10</i> R:  | Sangon Biotech | Custom made |
| GGCTCGCAGGGATGATTTCAA    |                |             |
| Mouse- <i>Il6</i> F:     | Sangon Biotech | Custom made |
| AGACAAAGCCAGAGTCCTTCAG   |                |             |
| Mouse- <i>Il6</i> R:     | Sangon Biotech | Custom made |
| GAGCATTGGAAATTGGGGTAGG   |                |             |
| Mouse- <i>Il1β</i> F:    | Sangon Biotech | Custom made |
| GGGCTGGACTGTTTCTAATGC    |                |             |
| Mouse- <i>Il1β</i> R:    | Sangon Biotech | Custom made |
| CTTGTGACCCTGAGCGACC      |                |             |
| Mouse- <i>TNFα</i> F:    | Sangon Biotech | Custom made |
| GATCGGTCCCCAAAGGGATG     |                |             |
| Mouse- <i>TNFα</i> R:    | Sangon Biotech | Custom made |
| TTTGCTACGACGTGGGCTAC     |                |             |
| Mouse- <i>iNOS</i> F:    | Sangon Biotech | Custom made |
| GTTCTCAGCCCAACAATACAAGA  |                |             |
| Mouse- <i>iNOS</i> R:    | Sangon Biotech | Custom made |
| GTGGACGGGTCGATGTCAC      |                |             |
| Mouse- <i>Cxcl1</i> F:   | Sangon Biotech | Custom made |
| TGGCTGGGATTCACCTCAAG     |                |             |
| Mouse- <i>Cxcl1</i> R:   | Sangon Biotech | Custom made |
| CCGTTACTTGGGGACACCTT     |                |             |
| Mouse- <i>β-actin</i> F: | Sangon Biotech | Custom made |
| CACTGTCTGAGTCGCGTCCA     |                |             |
| Mouse- <i>β-actin</i> R: | Sangon Biotech | Custom made |
| GACCCATTCCCACCATCACA     |                |             |
| Human- <i>Ccl2</i> F:    | Sangon Biotech | Custom made |
| CAGCCAGATGCAATCAATGCC    |                |             |
| Human- <i>Ccl2</i> R:    | Sangon Biotech | Custom made |

|                         |                |             |
|-------------------------|----------------|-------------|
| TGGAATCCTGAACCCACTTCT   |                |             |
| Human- <i>Ccl4</i> F:   | Sangon Biotech | Custom made |
| CTGTGCTGATCCCAGTGAATC   |                |             |
| Human- <i>Ccl4</i> R:   | Sangon Biotech | Custom made |
| TCAGTTCAGTTCAGGTCATACA  |                |             |
| Human- <i>Ccl5</i> F:   | Sangon Biotech | Custom made |
| CCAGCAGTCGTCTTTGTCAC    |                |             |
| Human- <i>Ccl5</i> R:   | Sangon Biotech | Custom made |
| CTCTGGGTTGGCACACACTT    |                |             |
| Human- <i>Ccl7</i> F:   | Sangon Biotech | Custom made |
| ATGAAAGCCTCTGCAGCACT    |                |             |
| Human- <i>Ccl7</i> R:   | Sangon Biotech | Custom made |
| GTCCTGGACCCACTTCTGTG    |                |             |
| Human- <i>Ccl8</i> F:   | Sangon Biotech | Custom made |
| TGGAGAGCTACACAAGAATCACC |                |             |
| Human- <i>Ccl8</i> R:   | Sangon Biotech | Custom made |
| TGGTCCAGATGCTTCATGGAA   |                |             |
| Human- <i>Ccl20</i> F:  | Sangon Biotech | Custom made |
| TGCTGTACCAAGAGTTTGCTC   |                |             |
| Human- <i>Ccl20</i> R:  | Sangon Biotech | Custom made |
| CGCACACAGACAACCTTTTCTTT |                |             |
| Human- <i>Cxcl10</i> F: | Sangon Biotech | Custom made |
| GTGGCATTCAAGGAGTACCTC   |                |             |
| Human- <i>Cxcl10</i> R: | Sangon Biotech | Custom made |
| TGATGGCCTTCGATTCTGGATT  |                |             |
| Human- <i>gapdh</i> F:  | Sangon Biotech | Custom made |
| ACGGATTTGGTTCGTATTGGG   |                |             |
| Human- <i>gapdh</i> R:  | Sangon Biotech | Custom made |
| TGATTTTGGAGGGATCTCGC    |                |             |
| Human- <i>Hk1</i> F:    | Sangon Biotech | Custom made |
| CGCAGCTCCTGGCCTATTAC    |                |             |
| Human- <i>Hk1</i> R:    | Sangon Biotech | Custom made |
| CATGATTCACTTGCACCCGC    |                |             |
| Human- <i>Hk2</i> F:    | Sangon Biotech | Custom made |
| CCTCGGTTTCCCAACTCTGC    |                |             |
| Human- <i>Hk2</i> R:    | Sangon Biotech | Custom made |
| ACTGGTCAACCTTCTGCACT    |                |             |
| Human- <i>Pkm1</i> F:   | Sangon Biotech | Custom made |
| AGAACTTGTGCGAGCCTCAA    |                |             |
| Human- <i>Pkm1</i> R:   | Sangon Biotech | Custom made |
| GAGCAGACCTGCCAGACTC     |                |             |
| Human- <i>Ldha</i> F:   | Sangon Biotech | Custom made |
| TTGTTGGGGTTGGTGCTGTT    |                |             |
| Human- <i>Ldha</i> R:   | Sangon Biotech | Custom made |

AGATATCCACTTTGCCAGAGACAA

Human-*Eno2* F: Sangon Biotech Custom made

AGCCTCTACGGGCATCTATGA

Human-*Eno2* R: Sangon Biotech Custom made

TTCTCAGTCCCATCCAACTCC

Universal 16S rRNA F: Sangon Biotech Custom made

GCCAGCAGCCGCGGTAA

Universal 16S rRNA R: Sangon Biotech Custom made

AGGGTATCTAATCCT

---

#### Software and Algorithms

---

|                |                      |                                                                                                            |
|----------------|----------------------|------------------------------------------------------------------------------------------------------------|
| FlowJo10.4     | TreeStar             | <a href="https://www.flowjo.com">https://www.flowjo.com</a><br>RRID: SCR_008520                            |
| Prism 6        | GraphPad<br>software | <a href="https://www.graphpad.com/">https://www.graphpad.com/</a><br>RRID: SCR_002798                      |
| Image Pro Plus | Media<br>Cybernetics | <a href="http://www.mediacy.com/imageproplus/">http://www.mediacy.com/imageproplus/</a><br>RRID:SCR_007369 |
| ImageJ         | ImageJ               | <a href="https://imagej.net/">https://imagej.net/</a><br>RRID:SCR_003070                                   |

---

#### Deposited data

---

|                          |     |                                                                     |
|--------------------------|-----|---------------------------------------------------------------------|
| 16S rRNA gene sequencing | SRA | NCBI Sequence Read Archive<br>(SRA): PRJNA946039 and<br>PRJNA945177 |
| RNA sequencing data      | SRA | NCBI Sequence Read Archive<br>(SRA): PRJNA946043 and<br>PRJNA946045 |

---

**Table S2. Characteristics of tinidazole users or patients with UC**

| Participants | Age (year) | Sex    | ILA (ng/g) | Calprotein( $\mu$ g/g) | CRP (mg/L) | Note                  |
|--------------|------------|--------|------------|------------------------|------------|-----------------------|
| 1            | 20         | male   | -          | -                      | -          | Healthy               |
| 2            | 23         | female | -          | -                      | -          | Healthy               |
| 3            | 24         | male   | -          | -                      | -          | Healthy               |
| 4            | 21         | female | -          | -                      | -          | Healthy               |
| 5            | 24         | female | -          | -                      | -          | Healthy               |
| 6            | 25         | female | -          | -                      | -          | Tinidazole, 1g/d, 3 d |
| 7            | 25         | male   | -          | -                      | -          | Tinidazole, 1g/d, 3 d |
| 8            | 21         | female | -          | -                      | -          | Tinidazole, 1g/d, 3 d |
| 9            | 20         | female | -          | -                      | -          | Tinidazole, 1g/d, 3 d |
| 10           | 23         | male   | -          | -                      | -          | Tinidazole, 1g/d, 3 d |
| 11           | 26         | female | -          | -                      | -          | Tinidazole, 1g/d, 3 d |
| 12           | 21         | male   | -          | -                      | -          | Tinidazole, 1g/d, 3 d |
| 13           | 24         | female | -          | -                      | -          | Tinidazole, 1g/d, 3 d |
| 14           | 13         | female | 88.6       | 576.2                  | 65.4       | UC                    |
| 15           | 83         | female | 384        | -                      | 14.1       | UC                    |
| 16           | 22         | male   | 58.2       | 585.7                  | 24.7       | UC                    |
| 17           | 50         | female | 1100       | -                      | 1.8        | UC                    |
| 18           | 50         | female | 103        | 793.2                  | -          | UC                    |
| 19           | 52         | male   | 73.7       | 294.2                  | -          | UC                    |
| 20           | 62         | male   | 98.6       | 522.4                  | -          | UC                    |
| 21           | 40         | male   | 608        | 69.4                   | 2.9        | UC                    |
| 22           | 50         | male   | 547        | 30                     | -          | UC                    |
| 23           | 65         | female | 2790       | -                      | 3.8        | UC                    |
| 24           | 70         | male   | 2280       | -                      | 5.7        | UC                    |
| 25           | 64         | female | 1010       | 30                     | 1.6        | UC                    |
